# Supplementary material for: Comparative evaluation of sequencing platforms: Pacific Biosciences, Oxford Nanopore Technologies, and Illumina for 16S rRNA-based soil microbiome profiling
Source: Front Microbiol. 2025 Aug 6;16:1633360. doi: 10.3389/fmicb.2025.1633360 (PMC12365774; doi:10.3389/fmicb.2025.1633360)
Supplement: SUPPLEMENTARY TABLE S1 — Number of raw reads obtained for each sequencing technology. [file Table_1.XLSX]

## Sheet: Table S1
Sample ID		Soil type	Variant	Depth	PacBio							ONT							Illumina (V4 region)						Illumina (V3-V4 region)						PacBio
	Biological repeats				Raw number of reads	Raw reads average quality	Mean raw reads length	Filtered number of reads	Percent filtered reads	Mean filtered read length	Filtered reads average quality	Raw number of reads	Raw reads average quality	Mean raw reads length	Filtered number of reads	Percent filtered reads	Mean filtered read length	Filtered reads average quality	Input reads	Filtered reads	Denoised R1 reads	Denoised R2 reads	Merged reads	Nonchim reads	Input reads	Filtered reads	Denoised R1 reads	Denoised R2 reads	Merged reads	Nonchim reads	V4 region raw number of reads	V4 region filtered number of reads	V3-V4 region merged number of reads	V3-V4 region merged number of reads
19_ONT	1_1	Black soil leached	Unchanged ploughed field (20 years)	0-25 cm	37027	29.1	1498.8	36947	0.216059	1498.3	29.11	142152	14.23	1476.6	127703	10.1645	1492.6	14.99	88608	82353	77962	79044	52869	31405	43977	36788	34846	34413	18772	13553	16430	15863	15648	14351
20_ONT	1_2	Black soil leached	Unchanged ploughed field (20 years)	0-25 cm	37465	28.98	1496	37385	0.213533	1495.5	28.99	125619	14.11	1441.1	107357	14.5376	1488.3	14.87	69190	64052	59403	60774	36796	23728	46646	39454	37079	36588	17409	13163	16591	16018	15842	14506
21_ONT	1_3	Black soil leached	Unchanged ploughed field (20 years)	0-25 cm	35797	28.93	1496.6	35688	0.304495	1496.1	28.94	79327	14.08	1444.2	67155	15.3441	1488.6	14.88	77054	71446	66514	68326	42517	27115	55640	47089	44568	44142	21218	15679	16013	15426	15366	13985
22_ONT	2_1	Black soil leached	Removal of straw from the field + clean ploughed field	0-25 cm	35399	28.83	1496.5	35295	0.293794	1495.9	28.83	146468	14.11	1447.8	125971	13.9942	1486.9	14.86	73049	67686	62721	64850	39899	25253	65043	55024	51978	51599	24920	17771	15701	15119	14906	13585
23_ONT	2_2	Black soil leached	Removal of straw from the field + clean ploughed field	0-25 cm	36153	28.96	1496	36040	0.312561	1495.3	28.97	108036	14.14	1453.1	93178	13.7528	1487	14.92	61376	56739	51814	53852	31109	21547	50942	43304	40605	40321	19769	14796	16298	15754	15489	14156
24_ONT	2_3	Black soil leached	Removal of straw from the field + clean ploughed field	0-25 cm	37675	28.91	1495.1	37576	0.262774	1494.5	28.92	185401	14.14	1457.1	163367	11.8845	1486.7	14.88	60020	55081	50027	52190	28216	19125	51180	41550	38669	38376	16100	12412	16753	16152	16016	14624
25_ONT	3_1	Black soil leached	Leaving straw on the field + clean ploughed field	0-25 cm	41001	29.09	1497.8	40885	0.28292	1497	29.1	100938	14.1	1439.2	85052	15.7384	1485.4	14.87	66056	61287	56447	57969	33687	22233	57859	48977	45838	45451	22813	16177	18028	17432	16989	15585
26_ONT	3_2	Black soil leached	Leaving straw on the field + clean ploughed field	0-25 cm	43532	29.02	1496.7	43425	0.245796	1496.1	29.03	115083	14.01	1151.3	59900	47.9506	1480.6	14.83	51812	47786	43547	45239	26737	19101	69281	56934	53977	53516	27144	19444	19318	18641	18449	16868
27_ONT	3_3	Black soil leached	Leaving straw on the field + clean ploughed field	0-25 cm	37596	28.97	1494.6	37500	0.255346	1494	28.98	93404	14	1431.3	77463	17.0667	1482.5	14.82	80084	74125	68052	70044	39240	26007	56668	47193	44145	43557	16410	12185	16570	15958	15793	14364
28_ONT	4_1	Black soil leached	Leaving straw on the field + sideral ploughed field	0-25 cm	40354	29.1	1495.6	40256	0.242851	1494.9	29.1	87282	13.94	1431.2	71877	17.6497	1485.3	14.8	63037	58560	53610	55468	31192	21129	50442	42412	39788	39098	15928	11593	17802	17190	16883	15487
29_ONT	4_2	Black soil leached	Leaving straw on the field + sideral ploughed field	0-25 cm	42157	28.98	1495.2	42037	0.28465	1494.8	28.98	81448	13.95	1435.9	67406	17.2404	1485.2	14.81	75054	69742	63940	66318	37164	25656	42430	35134	32407	31850	11692	9300	18684	18048	17853	16317
30_ONT	4_3	Black soil leached	Leaving straw on the field + sideral ploughed field	0-25 cm	44462	28.88	1496	44332	0.292385	1495.3	28.89	79390	14.05	1440.3	66591	16.1217	1486.3	14.87	71242	66135	61610	62877	38239	24151	58091	49231	46357	46400	23052	16095	19729	19017	18909	17231
31_ONT	5_1	Permafrost meadow black soil	Unchanged ploughed field (30 years)	0-10 cm	37175	28.75	1492.1	37028	0.395427	1490.4	28.76	117116	14.16	1455.5	102399	12.5662	1475.4	14.9	44506	40232	36650	37997	21491	15877	44003	37524	35069	34689	16834	13816	16418	15778	15967	14453
32_ONT	5_2	Permafrost meadow black soil	Unchanged ploughed field (30 years)	0-10 cm	42486	28.74	1493.3	42284	0.475451	1491	28.74	119015	14.06	1432.5	98983	16.8315	1484.3	14.82	78344	70374	64662	66823	36755	24763	50120	41777	38716	38302	17978	14344	18711	17978	18274	16533
33_ONT	5_3	Permafrost meadow black soil	Unchanged ploughed field (30 years)	0-10 cm	39313	28.62	1492.7	39131	0.462951	1490.4	28.63	87046	14.06	1450.4	74768	14.1052	1483	14.87	69801	62960	57774	59663	34911	24471	46603	39470	36599	36269	17503	14110	17242	16556	16881	15271
34_ONT	6_1	Permafrost meadow black soil	Unchanged ploughed field (30 years)	10-25 cm	40682	28.81	1497.2	40476	0.506366	1494.9	28.82	46864	14.08	1439.5	39171	16.4156	1485.3	14.87	27502	24886	21696	23124	11836	8604	49027	40533	37760	37416	17919	13816	18167	17522	17743	16137
35_ONT	6_2	Permafrost meadow black soil	Unchanged ploughed field (30 years)	10-25 cm	40221	28.83	1496.5	39959	0.651401	1493.5	28.84	85083	14.03	1438	70987	16.5674	1485.8	14.83	72850	66620	61005	63066	36822	25714	50207	39365	36573	35454	15915	12821	17860	17159	17425	15840
36_ONT	6_3	Permafrost meadow black soil	Unchanged ploughed field (30 years)	10-25 cm	39031	28.75	1496.1	38855	0.450924	1493.9	28.76	86398	14.07	1447.9	73858	14.5142	1486.8	14.84	74396	68021	62574	64802	38588	26435	47320	37729	34822	34344	16105	12743	17228	16557	16829	15204
37_ONT	7_1	Permafrost meadow black soil	Agrocenosis of perennial herbs	0-10 cm	49126	28.84	1494.3	48822	0.618817	1491.4	28.85	97248	14.04	1443.1	81992	15.6877	1480.5	14.87	75764	70360	64096	66837	37338	26042	44423	35262	32374	31952	13406	11250	21581	20754	21133	19222
38_ONT	7_2	Permafrost meadow black soil	Agrocenosis of perennial herbs	0-10 cm	45151	28.69	1493.3	44894	0.569201	1491.2	28.7	120321	14.01	1420.9	97671	18.8246	1483.5	14.8	73973	68206	61384	64825	33695	25017	53077	42480	39164	38148	15188	12662	20004	19225	19646	17818
39_ONT	7_3	Permafrost meadow black soil	Agrocenosis of perennial herbs	0-10 cm	37867	28.72	1493	37617	0.660205	1490.6	28.73	128052	14.07	1433.6	106677	16.6924	1482.9	14.85	64548	59684	54249	56588	29805	22387	40306	32894	30122	29492	12301	10286	16577	15976	16299	14814
40_ONT	8_1	Permafrost meadow black soil	Agrocenosis of perennial herbs	10-25 cm	42206	28.68	1491.9	41952	0.60181	1489.6	28.69	109229	13.94	1426	88779	18.7221	1479.7	14.79	78086	71896	65159	68376	37312	26547	55208	43088	40047	38885	16690	13725	18507	17765	18124	16400
41_ONT	8_2	Permafrost meadow black soil	Agrocenosis of perennial herbs	10-25 cm	36646	28.31	1496.1	36389	0.701304	1492.9	28.32	97125	14.09	1442.7	82327	15.236	1485.7	14.87	67676	62712	57181	59761	33863	24108	55394	44345	41389	40448	19400	15436	16034	15370	15651	14008
42_ONT	8_3	Permafrost meadow black soil	Agrocenosis of perennial herbs	10-25 cm	38363	28.72	1495.5	38132	0.602143	1492.6	28.73	111655	14.09	1447.4	95252	14.6908	1482.6	14.87	74274	68472	63321	65094	38198	25886	55059	42069	39435	38967	20013	16250	17056	16402	16639	15061
43_ONT	9_1	Permafrost meadow black soil	Tselina	0-10 cm	47278	28.95	1495.4	47047	0.488599	1493.8	28.96	61478	13.96	1416.4	49199	19.973	1484.1	14.77	94946	88281	80315	83766	47191	30423	58771	51100	47232	46524	16582	12145	20895	20211	20454	18680
44_ONT	9_2	Permafrost meadow black soil	Tselina	0-10 cm	41795	28.78	1495.7	41573	0.531164	1493.5	28.78	69009	13.95	1421.1	55489	19.5916	1483.6	14.77	76556	70695	63975	67297	36062	24437	46825	40868	37402	36959	13847	11138	18451	17763	18066	16399
45_ONT	9_3	Permafrost meadow black soil	Tselina	0-10 cm	46080	28.84	1494.5	45855	0.488281	1492.5	28.84	70387	13.95	1428.4	56800	19.3033	1482.4	14.8	78057	72764	66031	69371	37545	25231	41889	29852	27104	26666	8577	6877	20410	19662	20048	18262
46_ONT	10_1	Permafrost meadow black soil	Tselina	10-25 cm	42461	28.64	1499.4	42114	0.817221	1495.7	28.65	34810	13.98	1418.8	27693	20.4453	1485.5	14.79	76398	71014	65065	67642	39810	24792	57752	50618	46997	46852	20588	14438	18809	18105	18281	16592
47_ONT	10_2	Permafrost meadow black soil	Tselina	10-25 cm	39251	28.85	1499.3	38881	0.942651	1495	28.87	20440	13.89	1416.7	16017	21.6389	1480.9	14.75	69052	64128	58659	61008	35738	22384	24849	5878	4812	4394	1761	1604	17163	16469	16603	15093
48_ONT	10_3	Permafrost meadow black soil	Tselina	10-25 cm	44597	28.74	1498.8	44299	0.668206	1495.9	28.75	66139	13.9	1428.4	53411	19.2443	1458.4	14.72	67704	62363	56968	59055	34878	22393	50105	43135	40102	39790	18522	13064	19741	18945	19263	17436
49_ONT	11_1	Gray	Ploughed field (1 year)	0-10 cm	36404	28.6	1492.1	36251	0.420283	1491.2	28.6	14468	13.94	1415.3	11442	20.9151	1475.1	14.84	69922	63305	57825	60183	33139	22652	49758	43742	41001	40516	18638	14591	15896	15282	15659	14183
50_ONT	11_2	Gray	Ploughed field (1 year)	0-10 cm	36357	28.8	1492.8	36233	0.341062	1491.8	28.8	9096	14.28	1480.2	8209	9.75154	1490.3	15.03	64815	57023	52057	54455	30239	21458	52596	45393	42331	42142	20445	15877	16101	15491	15859	14397
51_ONT	11_3	Gray	Ploughed field (1 year)	0-10 cm	41846	28.69	1491.7	41717	0.308273	1491.1	28.71	43839	13.99	1421.5	35661	18.6546	1478.9	14.81	100078	90958	84904	86934	49732	32699	47776	41652	39022	38789	18118	15035	18563	17855	18308	16608
52_ONT	12_1	Gray	Ploughed field (1 year)	10-25 cm	40166	28.76	1494.9	40023	0.356023	1493.8	28.77	38091	14.03	1429	31471	17.3794	1481.8	14.85	75723	69603	64411	66286	38949	24818	55550	48411	45220	44959	19394	14719	17802	17123	17498	15920
53_ONT	12_2	Gray	Ploughed field (1 year)	10-25 cm	40702	28.8	1493.3	40588	0.280085	1492.6	28.81	57899	14.02	1423.5	46915	18.971	1482.5	14.85	80305	73409	67881	69970	39833	27332	51100	43617	40840	40176	17876	14192	18201	17517	17965	16401
54_ONT	12_3	Gray	Ploughed field (1 year)	10-25 cm	65811	28.82	1492.4	65626	0.281108	1491.7	28.82	48856	14.1	1441.7	41347	15.3697	1482.8	14.87	74090	67332	61909	64063	36657	25796	59246	52508	49297	48771	22603	17848	29439	28308	28998	26414
55_ONT	13_1	Gray	Miscanthus without fertilizer	0-10 cm	40589	29	1492.1	40430	0.391732	1491.1	29.01	67850	13.98	1422.1	54857	19.1496	1480.5	14.82	69963	64245	58147	61153	32791	22890	50901	43804	40314	39796	16149	12794	18076	17434	17837	16284
56_ONT	13_2	Gray	Miscanthus without fertilizer	0-10 cm	35112	28.91	1493	34893	0.623718	1490.9	28.92	89899	14.12	1456.4	78032	13.2004	1484.8	14.89	83139	75100	69319	71541	41120	27770	62629	54609	51259	50607	25145	19472	15580	15006	15390	14051
57_ONT	13_3	Gray	Miscanthus without fertilizer	0-10 cm	40859	28.96	1492.4	40635	0.548227	1490.6	28.96	55132	14.04	1434.7	45962	16.6328	1481.8	14.83	76876	70017	63963	66460	35579	25704	57359	50020	46473	46283	20113	16531	18273	17627	18054	16491
58_ONT	14_1	Gray	Miscanthus without fertilizer	10-25 cm	41252	28.87	1496.6	41058	0.47028	1495.1	28.87	68261	14.17	1466.2	60389	11.5322	1488.2	14.92	67512	61413	57274	58358	36522	23468	65157	54758	51821	51383	28506	20482	18404	17748	18068	16424
59_ONT	14_2	Gray	Miscanthus without fertilizer	10-25 cm	40992	28.82	1495.5	40770	0.541569	1493.7	28.81	84720	14.09	1435.6	70400	16.9027	1486.8	14.88	22673	20936	18474	19526	10388	7561	48745	41565	39050	38644	19577	15181	18426	17723	18129	16461
60_ONT	14_3	Gray	Miscanthus without fertilizer	10-25 cm	41390	28.8	1496.1	41193	0.47596	1494.7	28.81	87895	13.98	1433.7	72617	17.3821	1485.7	14.81	34039	31273	27999	29395	15716	11207	53034	45695	43042	42373	20382	14923	18571	17857	18227	16591
61_ONT	15_1	Gray	Miscanthus N120	0-10 cm	41813	29.04	1490.6	41296	1.23646	1485.7	29.05	81217	14.21	1454	71212	12.3188	1463.7	14.93	35158	31823	29195	30368	18398	13262	49569	43112	40720	40152	21496	15938	18816	18208	18646	17081
62_ONT	15_2	Gray	Miscanthus N120	0-10 cm	42173	28.92	1493.2	41700	1.12157	1489.2	28.93	83125	14.23	1466.6	73741	11.289	1485.5	14.97	30593	27702	24746	26159	14008	10601	56165	48866	45805	45547	22056	16783	18986	18320	18812	17137
63_ONT	15_3	Gray	Miscanthus N120	0-10 cm	45969	28.91	1492.6	45428	1.17688	1488.3	28.91	85458	14.27	1469.3	76146	10.8966	1481.4	15	27927	25391	22645	23943	13156	10032	48197	42110	39624	39482	20913	16176	20370	19621	20143	18345
64_ONT	16_1	Gray	Miscanthus N120	10-25 cm	42438	28.99	1494.3	42108	0.777605	1492.1	29	69593	14.04	1438.4	58328	16.187	1483.6	14.85	31888	28826	25771	27178	14977	10285	54903	46351	43559	43355	20083	15226	18891	18239	18602	16982
65_ONT	16_2	Gray	Miscanthus N120	10-25 cm	38615	28.9	1496.2	38343	0.704389	1494.2	28.9	52935	14.01	1426.8	43469	17.8823	1484.6	14.8	31016	28463	24798	27047	13913	10485	54986	47438	44158	43913	18942	14279	17233	16636	16977	15494
66_ONT	16_3	Gray	Miscanthus N120	10-25 cm	40501	28.85	1497.2	40112	0.96047	1493.7	28.85	103337	14.19	1460.8	90316	12.6005	1465.8	14.93	32664	29739	26644	28072	15333	11735	61063	51811	48573	48118	23753	17430	17955	17281	17702	16071
Zymo_BIOMICS_SUP	-	ZymoBIOMICS Gut Microbiome Standard	Zymo_BIOMICS_SUP	-	-			-	-	-	-	42046	16.08	1451.1	39323	6.5	1469	16.21	-	-	-	-	-	-	-	-	-	-	-	-	-	-	-	-
Zymo_BIOMICS_HAC	-	ZymoBIOMICS Gut Microbiome Standard	Zymo_BIOMICS_HAC	-	-			-	-	-	-	43744	13.84	1447.6	38423	12.2	1465.6	14.62	-	-	-	-	-	-	-	-	-	-	-	-	-	-	-	-
