# Supplementary material for: Comparative evaluation of sequencing platforms: Pacific Biosciences, Oxford Nanopore Technologies, and Illumina for 16S rRNA-based soil microbiome profiling
Source: Front Microbiol. 2025 Aug 6;16:1633360. doi: 10.3389/fmicb.2025.1633360 (PMC12365774; doi:10.3389/fmicb.2025.1633360)
Supplement: SUPPLEMENTARY TABLE S2 — Taxonomic classification of the ZymoBIOMICS Microbial Community Standard for ONT. [file Table_2.XLSX]

## Sheet: Лист 1
	Oxford Nanopore Technologies								Pacific Biosciences
SampleID	10,000 raw reads		20,000 raw reads		25,000 raw reads		35,000 raw reads		10,000 raw reads		20,000 raw reads		25,000 raw reads		35,000 raw reads
	Unclassified	%	Unclassified	%	Unclassified	%	Unclassified	%	Unclassified	%	Unclassified	%	Unclassified	%	Unclassified	%
19	6	0.0667705	8	0.0445286	5	0.0222618	11	0.0349806	5	0.0501153	13	0.0651498	18	0.0721645	20	0.0572656
20	2	0.0235377	2	0.0116083	8	0.0375076	6	0.0200682	10	0.10022	20	0.100175	23	0.092225	33	0.0944882
21	1	0.0118427	6	0.0356231	5	0.0236384	8	0.0270398	6	0.0602531	10	0.0501605	14	0.0561775	17	0.0487218
22	6	0.0699953	12	0.0697553	13	0.0606428	15	0.0496968	7	0.0702036	12	0.0601987	20	0.0802472	28	0.0802338
23	2	0.0232531	7	0.0404765	4	0.0185692	9	0.0297688	3	0.0301054	6	0.0301023	10	0.0401188	12	0.0343948
24	6	0.0684229	7	0.0395883	7	0.0316857	18	0.0581658	9	0.0902075	20	0.100286	25	0.100253	33	0.0945288
25	2	0.0235988	3	0.0178688	6	0.0285633	9	0.0306029	2	0.0200461	12	0.0601896	8	0.0320744	16	0.0458479
26	0	0	3	0.0286752	3	0.0229639	5	0.0273284	7	0.0701543	7	0.0351036	13	0.0521209	14	0.0400939
27	4	0.0485732	5	0.0301605	10	0.0482532	12	0.0413693	13	0.130287	17	0.0852045	20	0.0802053	38	0.108858
28	3	0.0363064	5	0.0302865	8	0.0390263	10	0.0345363	9	0.0901533	23	0.115294	20	0.0802021	31	0.0887921
29	0	0	3	0.0181697	1	0.00484473	4	0.0137684	7	0.0701966	13	0.0652087	18	0.0722022	20	0.0573148
30	7	0.0834227	4	0.0237487	17	0.0810102	23	0.0784153	23	0.2306	36	0.180505	45	0.180498	67	0.191977
31	3	0.0343289	5	0.0285079	6	0.027528	8	0.0261515	5	0.0501756	13	0.0652643	20	0.0803116	21	0.0602375
32	3	0.0363152	2	0.0120315	2	0.00963391	3	0.0103245	4	0.0401687	20	0.100417	23	0.0924809	27	0.0775216
33	2	0.0230894	3	0.0174805	2	0.00930449	3	0.0099827	7	0.0703164	11	0.0552458	15	0.0602627	23	0.0659877
34	1	0.0119818	1	0.00600132	2	0.00959049	4	0.0137108	11	0.110697	19	0.0954342	31	0.124688	38	0.10912
35	3	0.0359066	7	0.0419539	10	0.0480769	12	0.0410706	8	0.0805477	11	0.0553571	19	0.0764711	27	0.0776576
36	1	0.0116877	4	0.0232666	2	0.00931663	3	0.0100097	8	0.0803939	12	0.060244	15	0.0602821	24	0.0688883
37	2	0.0238209	7	0.0415381	5	0.0236586	11	0.0373426	11	0.110608	22	0.110725	28	0.11269	44	0.126459
38	0	0	3	0.0185288	5	0.0246488	11	0.0386182	21	0.211204	31	0.155951	41	0.164897	66	0.189612
39	2	0.0241138	2	0.0119289	3	0.0143899	4	0.0137344	13	0.130864	18	0.0906071	29	0.116789	41	0.117931
40	0	0	1	0.00613911	1	0.0049169	3	0.0105322	15	0.150936	31	0.155873	40	0.16092	60	0.172468
41	0	0	2	0.0117772	1	0.00470588	3	0.0101262	13	0.130903	24	0.12084	30	0.120914	41	0.117975
42	2	0.0232423	4	0.0234549	5	0.0234093	7	0.023449	9	0.0905888	16	0.0805072	20	0.0804505	28	0.080469
43	1	0.0124131	2	0.012507	3	0.014944	6	0.0214125	4	0.0402334	4	0.0200904	6	0.0241216	11	0.0315874
44	1	0.0124054	1	0.00622355	4	0.0198916	5	0.0177211	3	0.0301598	8	0.040203	9	0.0361809	14	0.0402172
45	0	0	3	0.0185403	3	0.0148736	5	0.0176747	3	0.0301689	7	0.0351759	11	0.0442247	18	0.0516974
46	1	0.0125156	1	0.00627392	2	0.0100588	3	0.0108307	2	0.0201633	11	0.0554491	8	0.0322672	11	0.0316939
47	0	0	3	0.0191327	3	0.0187313	3	0.0187313	10	0.10102	3	0.0151492	7	0.0282863	16	0.0461361
48	1	0.012427	4	0.024728	6	0.0297368	8	0.0283366	10	0.100766	15	0.0754755	17	0.0684545	31	0.089165
49	1	0.0126438	3	0.0262284	3	0.0262284	3	0.0262123	29	0.291194	61	0.306256	71	0.285301	104	0.298396
50	7	0.0852723	7	0.0852723	7	0.0852723	7	0.0852723	11	0.11032	27	0.135474	36	0.144514	44	0.126147
51	3	0.0369595	4	0.0245218	6	0.029471	5	0.0175512	12	0.120289	19	0.0952285	24	0.0963198	31	0.0888481
52	4	0.048479	5	0.0302371	6	0.0290374	11	0.0380676	14	0.140464	29	0.145414	45	0.1806	64	0.183434
53	5	0.0612745	6	0.0371172	7	0.0344641	12	0.0423953	11	0.110331	18	0.0902437	28	0.112319	40	0.11461
54	2	0.023663	4	0.0236953	9	0.0426561	10	0.0337519	11	0.110397	20	0.100271	31	0.124403	51	0.146119
55	2	0.0249004	5	0.0310771	5	0.0247586	8	0.0282596	15	0.150557	31	0.155576	46	0.18468	65	0.186444
56	9	0.102529	11	0.0633896	13	0.0599769	22	0.0724709	25	0.251231	37	0.186304	42	0.169041	62	0.178258
57	5	0.0599233	13	0.0781532	15	0.0719873	26	0.0891143	25	0.251231	45	0.226324	71	0.285668	91	0.261442
58	6	0.0676209	14	0.0789355	16	0.0723753	24	0.0774643	18	0.18085	30	0.150716	32	0.128586	52	0.149314
59	1	0.0121065	6	0.0360209	7	0.0338181	14	0.0483659	16	0.160804	32	0.160925	33	0.132685	52	0.149391
60	3	0.0364919	3	0.0181324	5	0.0242542	4	0.0137979	7	0.0702811	18	0.0904205	22	0.0884244	25	0.0717566
61	5	0.0572082	13	0.0742263	27	0.122828	23	0.0748503	16	0.162173	37	0.187294	43	0.174181	62	0.17932
62	16	0.180363	24	0.134953	34	0.153388	49	0.157846	23	0.233053	46	0.232511	55	0.222591	82	0.236933
63	15	0.168256	15	0.0841609	24	0.107556	34	0.108953	27	0.273473	52	0.262945	70	0.283366	100	0.289159
64	3	0.0356803	4	0.0238237	8	0.0381971	11	0.0375209	15	0.151332	21	0.105948	34	0.13708	39	0.112292
65	5	0.0610575	6	0.0365542	11	0.0536428	11	0.0383168	13	0.131062	48	0.241655	50	0.201377	76	0.218661
66	11	0.124491	18	0.102963	25	0.114218	29	0.0947403	11	0.111156	26	0.131293	40	0.161636	50	0.144209
