# Supplementary material for: Comparative evaluation of sequencing platforms: Pacific Biosciences, Oxford Nanopore Technologies, and Illumina for 16S rRNA-based soil microbiome profiling
Source: Front Microbiol. 2025 Aug 6;16:1633360. doi: 10.3389/fmicb.2025.1633360 (PMC12365774; doi:10.3389/fmicb.2025.1633360)
Supplement: SUPPLEMENTARY TABLE S3 — Unique bacterial species detected by ONT and PacBio. [file Table_3.XLSX]

## Sheet: count_table
Approach	Escherichia coli	Roseburia hominis	Veillonella parvula	Veillonella rogosae	Faecalibacterium prausnitzii	Bacteroides fragilis	Fusobacterium nucleatum	Limosilactobacillus fermentum	Bifidobacterium adolescentis	Prevotella corporis	Clostridioides difficile	Akkermansia muciniphila	Candida albicans	Saccharomyces cerevisiae	Methanobrevibacter smithii	Salmonella enterica	Enterococcus faecalis	Clostridium perfringens
Control	14	14	0	14	14	14	6	6	6	6	1.5	1.5	1.5	1.4	0.1	0.01	0.001	0.0001
Zymo_BIOMICS_HAC	14.7404	14.2485	20.4841	0	12.8588	9.02798	7.162	5.61093	4.06506	3.9948	6.64151	0.988939	-	-	-	-	-	-
Zymo_BIOMICS_SUP	14.6217	14.2072	20.3306	0	12.8646	9.00445	7.51939	5.58932	4.0356	4.01271	6.65734	0.976478	-	-	-	-	-	-
