# Supplementary material for: Comparative evaluation of sequencing platforms: Pacific Biosciences, Oxford Nanopore Technologies, and Illumina for 16S rRNA-based soil microbiome profiling
Source: Front Microbiol. 2025 Aug 6;16:1633360. doi: 10.3389/fmicb.2025.1633360 (PMC12365774; doi:10.3389/fmicb.2025.1633360)
Supplement: SUPPLEMENTARY TABLE S4 — Unique bacterial species detected by ONT and PacBio. [file Table_4.XLSX]

## Sheet: ONT_10,000
Sample	Polyangium_fumosum	Microlunatus_sp._KUDC0627	Bacillus_sp._Y1	Occallatibacter_savannae	Rhizobacter_gummiphilus	Denitratisoma_oestradiolicum	Cyanothece_sp._PCC_7425	Sterolibacteriaceae_bacterium_M52	Caldanaerobacter_subterraneus	Stenotrophomonas_maltophilia	Lysinibacillus_manganicus	Noviherbaspirillum_massiliense	Nitrosospira_briensis	Moorea_producens	Luedemannella_helvata	Ilumatobacter_nonamiensis	Paraburkholderia_graminis	Bradyrhizobium_japonicum	Mucilaginibacter_gynuensis	Mucilaginibacter_ginsenosidivorans	Lysinibacillus_odysseyi	Variibacter_gotjawalensis	Phaselicystis_flava	Flavisolibacter_ginsengisoli	Gemmatimonas_aurantiaca	Anaeromyxobacter_sp._K	Acidimicrobium_ferrooxidans	Amaricoccus_macauensis	Methyloversatilis_sp._RAC08	Lysobacter_lycopersici	Woeseia_oceani	Bacillus_sp._1NLA3E	Frankia_sp._EAN1pec	Variovorax_ginsengisoli	Romboutsia_timonensis	Steroidobacter_agariperforans	Pseudoxanthobacter_liyangensis	Lysinibacillus_sp._2017	Laceyella_thermophila	Rhodoligotrophos_appendicifer	Rhodoligotrophos_jinshengii	Mesorhizobium_hankyongi	Geoalkalibacter_subterraneus	Roseomonas_aquatica	Bacillus_safensis	Paenibacillus_quercus	Bacillus_marisflavi
19	0	42	27	0	0	23	0	0	20	141	26	41	0	0	0	0	0	0	0	0	20	0	0	0	0	0	0	0	0	0	0	0	21	0	0	0	0	23	0	0	0	0	0	0	23	35	21
20	0	48	32	0	0	0	0	0	0	22	28	37	0	0	0	0	0	0	0	0	0	0	0	0	0	0	0	0	0	0	0	0	19	0	0	0	0	20	0	0	0	0	0	0	28	27	13
21	0	45	26	0	0	0	0	0	0	24	22	25	18	0	0	0	0	0	0	0	0	0	0	0	0	0	0	0	0	0	0	0	0	0	0	0	0	23	0	0	0	0	0	0	19	34	13
22	0	55	47	0	0	35	0	0	0	24	22	14	0	0	0	0	0	0	0	0	0	0	0	0	0	0	0	0	0	0	0	0	0	0	0	0	0	0	0	0	0	0	0	0	48	27	0
23	0	42	41	0	0	28	0	0	0	32	25	27	19	0	0	0	0	0	0	0	0	0	0	0	0	0	0	0	0	0	0	0	0	0	0	0	0	21	0	0	0	0	0	0	14	29	0
24	0	38	24	0	0	33	0	0	0	37	0	41	0	0	0	0	0	0	0	0	0	22	0	0	0	0	0	0	0	0	0	0	0	0	0	0	0	0	0	0	0	0	0	0	16	0	0
25	0	34	46	0	0	0	0	0	0	29	21	18	16	0	0	0	0	0	0	0	19	0	0	0	0	30	0	0	0	0	0	0	0	0	0	0	0	29	0	0	0	0	0	0	0	33	0
26	0	23	18	0	0	0	0	0	0	19	0	24	22	0	0	0	0	0	0	0	0	0	0	0	0	0	0	0	0	0	0	0	0	0	0	0	0	0	0	0	0	0	0	0	0	0	0
27	16	0	36	0	26	30	0	0	0	0	17	48	0	0	0	0	0	0	0	0	0	21	0	0	0	0	0	0	0	0	0	0	0	0	0	0	0	0	0	0	0	0	0	0	16	0	0
28	0	23	23	0	0	32	0	0	0	0	18	0	0	0	0	0	0	0	0	0	0	0	0	0	0	0	0	0	0	0	0	15	0	0	0	0	0	0	0	0	0	0	0	0	20	0	0
29	15	16	30	33	0	32	0	0	24	0	27	34	0	0	0	0	0	0	0	0	0	20	0	0	0	0	0	0	0	0	0	25	0	0	0	0	0	16	0	0	0	0	0	0	19	0	0
30	0	22	34	0	0	32	0	19	0	25	25	18	18	0	0	0	0	0	0	0	0	21	0	0	0	0	0	0	0	0	0	0	0	0	0	0	0	0	0	0	0	0	0	19	25	31	0
31	0	0	29	38	0	21	0	15	0	35	0	0	18	0	0	0	0	0	0	0	37	0	0	0	0	45	0	0	0	0	24	49	0	0	22	0	20	19	14	114	42	19	26	18	0	0	0
32	0	0	18	0	0	24	0	0	0	15	0	32	0	0	30	0	0	0	0	0	27	0	0	0	0	42	24	0	0	0	15	18	15	0	0	0	16	0	0	88	30	0	28	21	0	0	0
33	0	0	26	32	0	26	0	26	0	16	0	27	0	0	0	0	0	0	0	0	32	0	0	0	0	35	21	0	0	0	15	17	0	23	18	0	32	0	0	52	43	0	29	28	0	0	0
34	0	0	28	0	0	23	0	19	0	22	0	0	39	0	36	0	0	0	0	0	43	0	0	0	15	41	22	0	0	0	31	20	20	0	0	0	21	21	32	89	37	30	0	0	0	0	0
35	0	0	30	29	0	26	0	30	0	15	0	0	0	0	0	0	0	0	0	0	36	0	0	0	18	64	37	0	0	0	21	0	23	0	0	0	23	19	34	63	38	31	0	0	0	0	0
36	0	0	29	37	0	23	0	24	0	19	0	0	22	0	0	0	0	0	0	0	22	0	0	0	0	31	25	25	0	0	0	0	34	0	0	0	27	24	23	41	37	24	0	0	0	0	0
37	26	0	15	41	0	27	0	0	0	16	0	0	24	0	0	0	0	0	0	0	0	0	0	0	21	0	0	21	34	19	0	14	21	19	24	16	29	0	17	0	0	0	0	0	0	0	0
38	0	0	25	44	18	0	0	0	0	0	0	0	32	0	0	0	0	0	0	0	26	16	0	0	0	0	0	26	40	22	0	19	0	38	113	27	0	14	0	0	0	0	0	0	0	0	0
39	0	0	0	50	19	0	0	15	0	29	0	0	25	0	0	0	0	0	0	0	55	20	0	0	0	0	0	29	28	32	0	37	23	19	77	14	0	0	0	0	0	0	0	0	0	0	0
40	25	0	0	36	24	31	0	0	0	21	0	0	0	0	0	0	0	0	0	0	0	0	0	0	16	0	0	0	30	25	0	0	0	18	17	24	14	0	0	0	0	0	0	0	0	0	0
41	0	0	17	41	0	0	0	20	0	29	0	0	26	0	0	0	0	0	0	0	35	0	0	0	0	0	0	16	54	0	0	0	38	21	84	16	24	0	0	0	0	0	0	0	0	0	0
42	0	0	17	59	0	19	0	19	0	29	0	25	25	0	40	0	0	0	0	0	42	0	0	0	0	0	15	29	36	37	0	0	52	33	40	0	0	0	0	0	0	0	0	0	0	0	0
43	0	0	34	0	0	20	0	31	28	0	0	0	34	0	0	0	0	0	0	0	0	0	19	0	0	0	0	0	0	0	0	33	0	0	0	0	0	0	0	0	0	0	0	0	0	0	0
44	0	0	30	0	18	22	0	0	0	0	0	0	0	0	0	0	0	0	0	0	0	18	0	0	27	0	0	17	23	19	0	0	0	0	0	0	0	0	0	0	0	0	0	0	0	0	0
45	0	0	0	30	18	35	0	0	0	0	0	0	0	0	0	0	0	0	0	0	23	18	0	0	18	0	0	26	34	32	0	0	0	0	0	0	0	0	0	0	0	0	0	0	0	0	0
46	0	0	49	0	0	0	0	0	0	0	0	0	16	0	39	0	0	0	0	0	39	0	0	0	28	0	22	39	0	0	0	28	20	26	0	0	0	0	0	0	0	0	0	0	0	0	0
47	0	0	17	0	28	0	0	16	49	0	0	0	15	0	0	0	0	0	0	0	0	0	0	0	35	0	27	66	0	0	16	0	0	0	0	0	0	0	0	0	0	0	0	0	0	0	0
48	0	0	24	17	0	23	0	0	52	0	0	0	20	0	0	0	0	0	0	0	0	0	0	0	28	0	32	43	21	25	0	0	0	0	0	0	0	0	0	0	0	0	0	0	0	0	0
49	0	0	0	43	0	70	0	23	0	14	0	0	0	0	0	29	0	0	0	0	0	0	0	34	0	0	0	0	0	0	0	0	0	0	0	0	0	0	0	0	0	0	0	0	0	0	0
50	0	0	23	62	0	83	0	0	0	751	0	0	0	0	0	0	0	0	0	0	15	0	18	30	0	0	0	0	0	0	0	0	0	0	0	0	0	0	0	0	0	0	0	0	0	0	0
51	0	0	0	0	17	78	0	30	0	0	0	0	0	0	0	0	0	0	0	0	0	0	0	23	0	28	0	0	0	0	0	0	0	0	0	0	0	0	0	0	0	0	0	0	0	0	0
52	0	0	0	46	0	52	19	27	31	19	0	0	0	0	50	0	0	0	0	0	0	0	0	0	13	0	0	0	0	0	0	0	0	0	0	0	0	0	0	0	0	0	0	0	0	0	0
53	0	0	0	53	0	90	0	0	0	20	0	0	0	0	0	25	0	33	0	0	0	0	0	25	17	0	0	0	0	0	0	0	0	0	0	0	0	0	0	0	0	0	0	0	0	0	0
54	0	0	15	42	0	66	0	20	0	16	0	27	0	0	0	27	0	28	0	0	0	0	0	0	0	0	0	0	0	0	0	0	0	0	0	0	0	0	0	0	0	0	0	0	0	0	0
55	0	0	0	46	48	45	24	24	0	0	0	19	0	0	0	20	0	33	0	0	0	23	19	28	15	0	0	0	0	0	0	0	0	0	0	0	0	0	0	0	0	0	0	0	0	0	0
56	23	0	17	56	20	61	54	35	0	16	0	0	0	0	35	16	0	33	0	0	0	15	17	0	0	0	0	0	0	0	0	0	0	0	0	0	0	0	0	0	0	0	0	0	0	0	0
57	35	0	0	66	22	53	49	0	0	15	0	0	0	0	31	25	0	70	15	21	0	18	33	0	0	0	0	0	0	0	0	0	0	0	0	0	0	0	0	0	0	0	0	0	0	0	0
58	0	21	17	39	0	61	52	46	30	59	0	0	21	0	54	13	0	0	0	0	0	0	0	0	0	0	0	0	0	0	0	0	0	0	0	0	0	0	0	0	0	0	0	0	0	0	0
59	22	0	22	60	0	71	54	32	17	18	20	0	0	0	33	25	0	0	0	0	0	0	0	0	0	0	0	0	0	0	0	0	0	0	0	0	0	0	0	0	0	0	0	0	0	0	0
60	0	0	15	49	0	64	27	0	25	13	20	0	0	0	42	18	0	0	0	0	0	15	0	0	0	0	0	0	0	0	0	0	0	0	0	0	0	0	0	0	0	0	0	0	0	0	0
61	0	0	0	43	0	83	238	24	0	32	0	0	0	30	0	0	45	0	27	20	0	0	0	0	0	0	0	0	0	0	0	0	0	0	0	0	0	0	0	0	0	0	0	0	0	0	0
62	0	0	26	39	0	71	98	25	32	120	22	0	0	25	0	0	26	0	35	17	0	0	0	0	0	0	0	0	0	0	0	0	0	0	0	0	0	0	0	0	0	0	0	0	0	0	0
63	0	0	24	58	0	89	108	28	0	144	22	0	16	27	0	0	31	26	26	23	18	0	0	0	0	0	0	0	0	0	0	0	0	0	0	0	0	0	0	0	0	0	0	0	0	0	0
64	26	0	27	57	15	55	112	22	31	15	0	0	19	21	45	19	0	0	0	0	0	0	0	0	0	0	0	0	0	0	0	0	0	0	0	0	0	0	0	0	0	0	0	0	0	0	0
65	31	0	15	57	0	56	49	31	37	14	24	26	14	0	0	0	0	0	0	0	0	0	0	0	0	0	0	0	0	0	0	0	0	0	0	0	0	0	0	0	0	0	0	0	0	0	0
66	21	15	31	47	20	57	90	37	44	68	19	0	0	0	0	0	0	0	0	0	0	0	0	0	0	0	0	0	0	0	0	0	0	0	0	0	0	0	0	0	0	0	0	0	0	0	0

## Sheet: ONT_20,000
Sample	Pseudarthrobacter_sp._NIBRBAC000502772	Neobacillus_mesonae	Paenibacillus_sp._DCT19	Oscillatoria_nigro_viridis	Moorea_producens	Ilumatobacter_nonamiensis	Anaeromyxobacter_dehalogenans	Denitratisoma_oestradiolicum	Caldimonas_hydrothermale	Nitrosospira_briensis	Cyanothece_sp._PCC_7425	Thermotomaculum_hydrothermale	Luedemannella_helvata	Thermoflavimicrobium_dichotomicum	Paenibacillus_periandrae	Gemmatimonas_aurantiaca	Microlunatus_sp._KUDC0627	Geitlerinema_sp._PCC_7407	Desulfovibrio_magneticus	Stenotrophomonas_maltophilia	Mucilaginibacter_panaciglaebae	Ammonifex_degensii	Caldanaerobacter_subterraneus	Sporosarcina_soli	Bacillus_sp._1NLA3E	Arthrobacter_pascens	Acidisarcina_polymorpha	Leptothrix_mobilis	Anaeromyxobacter_sp._K	Bradyrhizobium_zhanjiangense	Paenibacillus_swuensis	Thermoactinomyces_khenchelensis	Alkalihalobacillus_murimartini	Nitrospira_lenta	Paraburkholderia_phymatum	Azoarcus_sp._DN11	Dictyobacter_aurantiacus	Herbiconiux_ginsengi	Rhodanobacter_denitrificans	Paenibacillus_nasutitermitis	Pseudomonas_sp._SXM_1	Tetrasphaera_duodecadis	Rudaibacter_terrae	Thiobacillus_denitrificans	Patulibacter_brassicae	Thiobacter_subterraneus	Ramlibacter_ginsenosidimutans	Peribacillus_psychrosaccharolyticus	Noviherbaspirillum_aurantiacum
19	0	0	29	0	0	0	38	35	0	21	0	0	0	0	33	0	76	26	25	285	0	0	23	0	0	0	0	0	0	0	28	21	0	0	0	0	0	0	0	27	0	0	0	0	0	0	0	20	0
20	0	30	23	0	0	0	18	52	0	25	0	0	21	0	14	0	92	0	16	39	0	0	0	17	0	0	0	0	19	0	25	0	0	0	0	0	0	0	0	14	0	0	0	0	0	0	0	0	20
21	15	29	21	0	0	13	0	53	0	14	0	0	0	0	21	0	76	24	0	38	0	0	18	16	0	0	0	0	0	0	19	0	0	0	0	0	0	0	0	48	0	0	0	0	0	0	0	18	22
22	15	28	0	0	0	0	50	76	0	0	0	0	0	0	19	0	104	0	24	47	0	0	0	0	0	0	0	0	0	0	0	15	0	0	0	0	0	0	0	19	0	0	0	0	0	0	0	0	15
23	25	27	0	0	0	0	40	53	0	24	0	0	26	0	29	28	72	0	20	74	0	0	19	18	0	0	0	0	0	0	0	0	0	0	0	0	0	0	0	0	12	0	0	0	0	0	0	0	0
24	17	17	0	76	0	17	22	44	0	20	0	0	35	0	29	0	60	37	31	74	0	0	34	0	0	0	0	0	27	0	0	0	0	0	0	0	0	0	0	0	0	0	0	0	0	0	0	0	12
25	0	18	0	19	0	0	20	57	0	0	0	0	33	0	26	0	80	21	0	48	0	0	22	0	0	0	0	0	23	0	25	17	0	0	0	0	0	0	0	37	0	0	0	0	0	0	0	14	0
26	0	0	0	0	0	0	0	39	0	19	0	0	0	0	0	0	41	0	0	20	0	0	0	18	0	0	0	0	0	0	0	0	0	0	0	0	0	0	0	0	0	0	0	0	0	0	0	0	0
27	0	27	0	481	0	0	32	38	0	24	0	0	0	0	20	0	47	27	0	21	0	0	0	0	0	0	0	0	0	0	0	0	0	0	0	0	0	0	0	0	13	0	0	0	0	0	0	0	15
28	0	29	0	27	0	0	22	63	0	22	0	0	25	0	16	0	44	0	0	16	0	0	29	0	14	0	0	0	23	0	0	0	0	0	0	0	0	0	0	0	0	0	0	0	0	0	0	0	0
29	0	27	0	12	0	0	23	56	0	31	0	0	0	0	18	17	50	0	0	21	0	0	50	0	33	0	0	0	17	0	0	0	0	0	0	0	0	0	0	0	0	0	0	0	0	0	0	0	0
30	16	33	0	35	0	0	43	45	0	24	0	0	0	0	15	0	45	28	0	47	0	0	0	25	0	0	0	0	0	0	0	0	25	0	0	0	0	0	0	38	0	0	0	0	0	0	0	0	15
31	0	0	0	0	0	0	19	37	0	38	0	13	32	0	0	19	0	26	0	55	0	0	0	0	68	0	0	0	35	0	0	27	0	30	0	0	0	0	0	0	0	0	0	0	16	0	20	25	0
32	0	28	56	0	0	0	20	51	0	21	0	0	37	0	21	15	0	0	0	36	0	0	0	0	21	0	0	0	47	0	0	19	0	16	0	0	0	0	0	0	0	0	0	0	12	0	0	18	0
33	0	16	49	0	0	0	0	39	29	0	0	0	21	0	28	25	0	0	0	29	0	0	0	0	36	0	0	0	63	0	0	0	0	21	0	0	0	0	0	0	0	0	0	0	19	0	18	20	0
34	0	0	0	0	0	0	0	89	0	50	0	31	40	0	0	27	0	0	0	43	0	0	22	19	28	0	0	0	49	0	0	22	0	19	0	0	0	0	0	0	20	0	0	0	0	0	0	0	0
35	0	26	0	0	0	0	29	47	0	27	0	0	54	0	25	18	0	0	0	54	0	18	25	0	26	0	0	0	50	0	0	25	0	25	0	0	0	0	0	0	0	0	0	0	0	0	0	28	0
36	30	21	0	0	0	0	0	39	0	14	0	0	29	0	0	20	0	0	0	56	0	0	0	0	28	0	0	0	72	0	0	24	0	15	0	0	0	0	0	0	0	0	0	0	0	0	0	0	0
37	22	0	0	0	0	0	16	30	0	25	0	0	35	0	0	33	0	0	0	23	0	0	0	0	0	86	0	0	27	0	0	0	0	0	0	0	0	0	0	0	0	0	0	0	0	0	34	25	0
38	16	15	0	0	0	14	0	29	0	30	0	0	0	27	0	23	0	0	0	23	0	0	0	0	57	20	0	0	28	0	0	0	0	0	0	0	0	0	0	0	0	0	0	0	0	0	47	0	0
39	0	0	0	0	0	0	18	27	0	33	0	45	0	0	0	22	0	0	0	40	0	0	0	0	94	0	0	0	18	0	0	0	0	0	0	0	0	0	0	0	0	0	0	0	26	27	0	13	0
40	20	0	0	618	0	0	0	33	27	25	0	0	45	0	0	31	0	46	0	17	0	0	0	0	0	35	0	0	31	0	0	0	0	0	0	0	0	0	0	0	0	0	0	0	0	0	27	13	0
41	22	0	0	0	0	0	0	34	31	40	0	15	42	0	0	29	0	0	0	58	0	0	0	0	28	75	0	0	39	0	0	13	0	19	0	0	0	0	0	0	0	0	0	0	0	0	0	0	0
42	33	0	0	0	0	0	0	23	23	40	0	21	42	0	19	24	0	0	0	54	0	0	0	17	13	50	0	0	36	0	0	18	0	15	0	0	0	0	0	0	0	0	0	0	0	0	12	0	0
43	0	46	0	0	0	14	0	32	0	27	0	0	0	0	30	32	0	0	0	0	0	0	36	0	62	0	0	0	0	27	0	0	0	18	0	0	0	0	0	0	0	0	0	0	19	0	24	16	0
44	0	18	0	0	0	0	0	39	0	36	0	0	32	0	0	35	17	0	0	0	0	0	29	0	0	0	0	19	30	26	0	0	0	0	0	0	0	0	0	0	0	0	0	0	14	26	0	0	0
45	0	0	0	0	0	16	0	47	21	22	0	0	0	0	0	32	0	0	0	15	0	26	30	0	0	20	0	0	0	31	0	0	0	0	0	0	0	0	0	0	0	0	0	0	0	34	19	0	0
46	0	36	0	0	0	14	0	34	0	43	0	0	44	26	0	41	0	0	0	19	0	28	44	0	58	0	0	0	35	0	0	0	0	0	0	0	0	0	0	0	0	0	0	0	0	21	0	15	0
47	0	0	0	0	0	16	0	31	0	27	0	16	35	0	0	73	0	0	0	17	0	0	67	0	0	0	0	0	28	0	0	0	0	19	0	0	0	0	0	0	0	0	0	0	0	43	0	0	0
48	0	29	0	0	0	19	0	47	26	31	0	0	25	0	0	71	0	0	0	0	0	24	73	0	0	0	0	0	44	0	0	0	0	24	0	0	0	0	0	0	0	0	0	0	0	47	0	0	0
49	0	0	0	0	0	21	35	106	39	0	0	14	0	0	0	22	0	0	0	22	0	0	0	0	0	0	0	0	0	0	0	0	0	0	0	0	0	0	0	0	0	0	0	0	0	0	17	0	38
50	0	0	0	0	0	0	0	83	37	0	0	13	0	0	0	0	0	19	0	751	0	0	0	0	0	0	0	0	0	0	31	0	0	0	0	0	0	0	0	0	0	0	0	0	0	0	0	0	46
51	0	24	0	0	0	15	47	99	25	14	0	16	25	0	14	20	0	0	0	27	0	0	0	0	14	0	0	0	0	0	22	0	0	0	0	22	0	0	0	0	0	0	0	0	0	40	20	0	41
52	0	22	0	0	0	18	0	76	22	14	47	0	74	0	19	24	27	0	0	38	0	24	35	0	0	0	18	0	0	14	0	0	0	0	0	0	0	0	0	0	0	0	0	0	0	0	0	0	0
53	21	15	0	0	0	28	31	112	30	19	0	0	32	0	0	27	0	0	0	44	0	20	22	0	22	0	0	0	21	18	0	0	0	0	0	33	0	0	0	0	0	14	0	21	0	26	0	0	25
54	0	0	0	0	0	27	39	107	38	22	0	15	33	0	20	13	0	0	0	36	0	0	41	0	20	0	0	0	0	26	0	0	0	0	14	0	0	0	0	0	0	0	0	23	0	29	0	0	21
55	33	23	0	0	0	32	0	77	0	18	25	0	41	0	0	20	0	0	0	24	0	0	0	0	0	0	18	0	21	21	0	0	0	0	0	0	0	0	0	0	0	0	0	19	0	0	17	0	18
56	12	0	0	26	20	40	26	72	22	31	107	32	52	0	25	0	20	0	23	33	28	0	40	0	0	0	0	20	0	16	0	0	0	0	0	0	0	0	0	0	0	0	0	22	13	0	19	0	0
57	22	17	0	21	0	34	0	62	26	0	77	19	50	0	0	0	0	0	0	22	18	0	0	0	0	0	30	0	0	22	0	0	0	0	0	0	0	0	0	0	0	0	0	0	12	0	18	0	0
58	33	14	0	0	18	24	31	89	31	29	91	26	70	0	22	24	32	0	0	96	0	0	58	0	11	0	23	0	0	0	29	0	0	0	19	0	0	0	0	0	0	0	0	0	0	0	0	0	0
59	0	26	0	0	0	45	0	86	34	22	107	14	47	0	18	0	15	0	0	32	0	21	39	0	16	0	17	0	0	0	0	0	0	0	0	0	0	0	0	0	0	0	0	0	0	24	0	0	0
60	19	33	0	0	0	21	0	81	21	16	57	14	69	0	29	17	17	0	0	19	0	0	47	0	16	0	31	0	0	17	0	0	0	0	0	0	0	0	0	0	0	0	0	0	0	0	0	0	0
61	0	0	0	35	72	16	0	80	32	20	466	0	43	0	33	0	0	44	0	46	15	27	0	0	0	0	0	23	0	0	0	0	20	0	21	26	14	21	25	0	16	13	21	14	0	0	46	0	0
62	16	0	0	0	0	25	0	90	21	17	183	0	30	25	22	0	0	23	0	183	53	21	38	0	16	0	0	29	0	0	0	0	40	0	29	27	59	27	17	0	19	19	25	21	24	21	28	12	16
63	0	13	0	0	27	17	0	85	27	17	183	0	0	0	12	0	27	22	0	296	28	26	0	0	21	0	0	24	0	0	0	0	29	16	31	32	19	34	24	42	20	16	18	15	0	0	0	0	0
64	20	23	0	37	41	25	0	79	30	26	241	0	58	19	37	20	25	19	0	31	12	64	0	12	0	0	20	0	0	0	26	13	0	0	0	0	0	0	0	0	0	0	0	0	0	0	0	0	0
65	0	22	0	0	17	21	0	106	0	18	92	25	43	20	0	20	0	0	0	25	25	19	60	19	25	20	19	17	30	20	0	0	0	0	0	0	0	0	0	0	0	0	0	0	0	0	0	0	0
66	19	17	20	22	25	24	29	92	34	16	158	20	65	19	26	21	24	20	24	118	20	35	60	24	15	0	0	0	0	0	0	0	0	0	0	0	0	0	0	0	0	0	0	0	0	0	0	0	0
[truncated: 43 more columns]

## Sheet: ONT_25,000
Sample	Neobacillus_mesonae	Arthrobacter_pascens	Pseudarthrobacter_sp._NIBRBAC000502772	Micromonospora_yangpuensis	Roseimicrobium_gellanilyticum	Microlunatus_sp._KUDC0627	Denitratisoma_oestradiolicum	Oscillatoria_nigro_viridis	Cyanothece_sp._PCC_7425	Geitlerinema_sp._PCC_7407	Luedemannella_helvata	Stenotrophomonas_maltophilia	Paenibacillus_nasutitermitis	Moorea_producens	Caldimonas_hydrothermale	Thiobacter_subterraneus	Nitrosospira_briensis	Acidisarcina_polymorpha	Paenibacillus_swuensis	Thermodesulforhabdus_norvegica	Thermoflavimicrobium_dichotomicum	Ammonifex_degensii	Paraburkholderia_phymatum	Desulfovibrio_magneticus	Paenibacillus_sp._DCT19	Bacillus_sp._1NLA3E	Mucilaginibacter_panaciglaebae	Thermoactinomyces_khenchelensis	Ilumatobacter_nonamiensis	Thermotomaculum_hydrothermale	Desulfomonile_tiedjei	Anaeromyxobacter_sp._K	Anaeromyxobacter_dehalogenans	Gemmatimonas_aurantiaca	Bradyrhizobium_zhanjiangense	Massilia_oculi	Bacillus_gibsonii	Nitrospira_lenta	Dactylosporangium_cerinum	Leptothrix_mobilis	Altererythrobacter_salegens	Burkholderia_sp._PAMC_28687	Burkholderia_sp._PAMC_26561	Herbiconiux_ginsengi	Patulibacter_brassicae	Glaciihabitans_tibetensis	Alkalihalobacillus_murimartini	Rhodanobacter_spathiphylli	Mucilaginibacter_sp._PAMC_26640
19	17	0	0	0	0	99	47	0	0	0	21	321	28	0	0	25	24	0	28	0	0	0	0	23	37	0	0	23	14	0	0	38	0	0	0	22	0	0	0	0	0	0	0	0	0	0	0	0	0
20	22	0	26	0	0	124	62	0	0	35	27	55	24	0	0	0	22	0	28	0	0	0	0	37	27	0	0	16	0	0	0	32	0	0	0	29	0	0	0	0	0	0	0	0	0	0	0	0	0
21	35	0	16	0	0	90	70	0	0	34	0	68	24	0	0	0	30	0	0	0	0	0	0	27	30	0	0	17	24	0	0	39	0	0	0	16	0	0	0	0	0	0	0	0	0	0	0	0	0
22	27	0	0	0	0	99	92	0	0	0	18	45	29	0	0	0	15	0	0	0	0	0	0	26	24	0	0	21	19	0	0	44	0	0	0	0	0	0	0	0	0	0	0	0	13	0	0	0	0
23	30	0	32	0	0	107	59	0	0	0	28	79	18	0	0	0	30	0	0	0	0	0	0	26	0	0	0	0	0	0	0	23	34	30	0	0	19	0	0	0	0	0	0	0	0	0	0	0	0
24	0	0	21	0	0	78	53	83	0	43	42	90	0	0	0	0	16	0	0	0	0	0	0	42	11	0	0	0	21	0	28	30	31	0	0	0	0	0	0	0	0	0	0	0	0	0	0	0	0
25	21	0	19	0	0	100	50	28	0	23	29	52	38	0	0	0	0	0	0	0	0	0	0	24	0	0	0	24	0	0	25	25	21	0	0	11	0	0	0	0	0	0	0	0	16	0	0	0	0
26	23	0	0	0	0	63	30	16	0	0	0	32	0	0	0	0	16	0	20	0	0	0	0	0	0	0	0	12	0	0	0	39	0	0	0	0	0	0	0	0	0	0	0	0	0	0	0	0	0
27	35	0	24	0	0	43	60	574	0	21	0	28	0	0	0	0	23	0	0	0	0	0	0	16	0	0	0	0	0	0	0	23	23	20	0	16	0	0	0	0	0	0	0	0	0	0	0	0	0
28	36	0	17	0	0	66	58	45	0	19	24	23	29	0	0	0	33	0	0	0	0	0	0	0	0	22	0	18	0	0	0	27	34	18	23	29	0	0	0	0	0	0	0	0	0	0	0	0	0
29	30	0	0	0	21	66	76	19	0	0	31	14	0	0	19	0	27	0	0	0	0	24	0	0	0	37	0	0	13	16	26	28	18	24	0	0	0	0	0	0	0	0	0	0	0	0	0	0	0
30	31	0	15	0	0	39	70	48	0	23	0	61	33	0	0	0	37	0	21	0	0	0	0	0	16	0	0	0	0	0	0	0	50	17	19	0	18	0	0	0	0	0	0	0	0	0	19	0	0
31	27	0	0	47	32	0	36	0	0	42	0	61	0	0	0	0	45	0	0	0	0	0	0	0	34	74	0	27	0	17	29	32	19	13	0	0	0	31	0	0	0	0	0	0	13	0	0	0	0
32	28	0	0	0	22	0	70	0	0	15	46	33	0	0	0	0	0	0	0	0	0	0	0	0	59	22	0	23	13	0	0	42	25	27	0	0	0	31	0	0	0	0	0	0	0	0	0	0	0
33	20	0	0	55	27	0	52	0	0	0	43	36	0	0	23	0	0	0	0	0	0	0	0	0	52	41	0	24	0	23	0	73	0	22	0	0	0	24	0	0	0	0	0	0	22	0	0	0	0
34	0	29	0	0	25	0	113	0	0	0	37	57	0	0	38	0	61	0	0	0	0	0	0	0	0	42	0	36	0	32	30	46	0	24	0	0	0	25	0	0	0	0	0	0	0	0	0	0	0
35	33	0	16	40	22	0	49	0	0	0	58	70	0	0	0	0	30	0	0	0	0	0	0	0	0	27	0	29	0	0	26	49	34	28	0	0	0	25	0	0	0	0	0	0	14	0	0	0	0
36	0	23	0	0	26	0	67	0	0	0	46	56	0	0	0	0	34	0	0	0	0	0	0	0	0	27	0	27	0	0	0	73	0	18	0	0	0	26	0	0	0	0	0	0	11	0	0	0	0
37	18	90	0	36	18	0	45	22	0	0	27	33	0	0	0	0	35	0	0	0	0	0	0	0	0	16	0	15	13	0	19	26	17	31	0	34	0	0	0	0	0	0	0	0	16	0	0	0	0
38	25	16	20	0	0	0	41	0	0	0	0	20	0	0	18	0	34	0	0	0	14	0	0	0	0	40	0	0	0	21	0	27	15	31	22	0	0	0	0	0	0	0	0	0	0	0	0	0	0
39	0	13	15	0	0	0	35	0	0	0	28	47	0	0	0	0	28	0	0	0	0	0	0	0	0	97	0	0	13	54	33	0	27	24	21	143	0	12	30	18	0	0	0	22	16	37	0	0	0
40	0	32	28	44	0	0	26	752	0	33	30	26	0	0	0	39	27	0	0	0	0	0	0	0	0	0	0	17	16	0	0	34	0	43	28	0	0	0	0	0	0	0	0	0	18	0	0	0	0
41	19	19	43	42	24	0	39	0	0	0	43	68	0	0	0	0	61	0	0	0	0	0	0	0	0	31	0	0	0	0	0	42	16	38	0	0	0	21	0	0	0	0	0	0	0	0	0	0	0
42	0	55	15	40	24	0	28	0	0	0	55	65	0	0	22	0	50	0	0	0	0	0	0	0	0	13	0	25	0	15	27	39	19	21	0	0	0	26	0	0	0	0	0	0	0	0	0	0	0
43	58	0	0	0	0	0	29	19	0	0	0	19	0	0	0	0	43	0	0	0	0	0	0	0	0	80	0	0	18	12	22	20	0	38	32	0	0	14	0	0	0	0	0	0	14	58	0	0	0
44	32	0	0	0	0	27	37	0	0	0	33	0	0	0	0	0	25	0	0	0	0	0	0	0	0	0	0	0	16	0	0	35	0	47	0	0	0	0	0	0	0	0	0	0	17	0	0	0	0
45	0	0	17	22	0	15	44	0	0	0	32	23	0	0	29	28	23	0	0	0	0	23	0	0	0	0	0	0	20	0	0	19	0	39	38	0	0	0	0	21	0	0	0	0	22	0	0	0	0
46	59	0	16	31	21	18	31	0	0	0	40	21	0	0	21	25	48	0	0	0	16	37	0	0	0	70	0	0	0	0	0	33	0	43	0	0	0	12	25	0	0	0	0	0	18	0	0	0	0
47	15	22	0	0	0	0	38	0	0	0	32	18	0	0	0	47	28	0	0	0	0	23	0	0	0	0	0	0	16	17	18	28	0	69	0	0	0	19	0	0	0	0	0	0	0	0	0	0	0
48	40	0	0	0	0	0	45	0	0	0	27	18	0	0	23	38	39	0	0	0	0	30	0	0	0	0	0	0	14	0	26	49	0	80	0	0	0	20	0	0	0	0	0	0	0	0	0	0	0
49	0	0	0	0	0	0	106	0	0	0	0	22	0	0	39	0	0	0	0	0	0	0	0	0	0	0	0	0	21	14	0	0	35	22	0	21	0	0	0	0	0	0	0	0	0	0	0	0	0
50	0	0	0	0	0	0	83	0	0	19	0	751	0	0	37	0	0	0	31	0	0	0	0	0	0	0	0	0	0	13	0	0	0	0	0	32	0	0	0	0	0	0	0	0	0	0	0	0	0
51	28	0	23	0	16	0	107	0	0	0	37	34	0	0	38	35	16	0	0	0	0	0	0	0	0	18	29	0	20	15	29	21	29	30	20	30	0	0	24	0	0	0	0	0	0	0	0	0	20
52	22	0	0	0	0	32	112	0	63	0	77	43	0	0	29	0	20	28	0	0	0	23	0	0	0	13	0	0	26	17	37	0	0	36	21	0	0	0	31	0	0	0	0	0	0	0	0	0	0
53	19	0	31	0	18	0	131	0	0	29	30	48	0	0	38	40	33	0	27	0	0	24	0	0	0	22	0	0	32	24	0	29	27	36	20	0	0	0	27	17	0	0	0	0	0	0	0	0	0
54	18	0	14	0	0	0	133	0	0	0	43	32	33	0	38	31	26	0	22	0	0	0	21	0	0	23	0	0	21	20	33	23	35	30	25	13	0	0	0	0	0	0	0	0	12	0	0	0	14
55	39	0	44	25	18	0	73	0	44	25	45	20	0	0	22	0	16	0	0	0	0	0	0	0	0	0	0	0	55	28	0	0	34	20	36	0	0	0	0	0	0	0	0	0	15	0	0	0	0
56	0	0	25	24	16	20	96	25	121	26	55	39	0	18	24	29	49	22	27	0	0	0	0	27	0	0	25	0	51	37	25	0	29	0	17	0	0	0	0	21	0	0	0	19	0	0	0	0	0
57	22	0	30	0	16	0	82	22	88	21	61	30	0	24	23	0	15	27	0	0	16	0	0	0	0	17	25	0	56	18	0	0	32	13	19	0	0	0	21	22	0	0	0	0	0	24	0	0	19
58	19	0	25	25	20	48	91	0	91	0	92	112	0	0	23	0	38	28	0	22	24	21	0	0	0	0	0	0	33	20	54	0	0	28	0	0	0	0	29	0	0	0	0	0	0	0	0	0	0
59	31	0	0	0	0	15	106	20	110	25	64	47	0	16	26	28	31	24	0	27	15	44	0	0	0	24	21	0	42	19	0	0	0	24	0	0	0	0	28	0	0	0	0	0	0	0	0	0	16
60	53	0	0	29	0	14	104	26	87	0	73	27	0	0	0	0	27	23	0	21	17	20	0	20	22	19	0	0	21	25	0	0	0	23	26	0	0	0	21	0	0	0	0	0	14	0	18	0	0
61	18	0	0	0	0	16	106	42	568	58	39	71	0	90	38	0	31	0	0	0	0	44	31	0	15	0	18	0	22	0	0	0	0	0	25	14	12	0	0	39	18	16	16	37	0	46	12	21	20
62	0	0	19	0	0	14	99	19	219	18	38	223	0	28	27	0	32	0	26	14	29	21	53	18	0	17	71	0	22	0	0	0	0	0	0	0	72	0	0	46	23	16	16	26	15	38	45	36	24
63	0	0	0	0	0	25	120	27	282	23	41	345	0	37	39	21	30	22	0	0	11	0	25	0	0	17	42	0	28	0	0	0	0	0	0	0	14	14	0	32	19	32	32	31	11	20	24	28	25
64	22	0	54	29	15	13	86	31	291	25	59	49	0	38	23	27	35	19	25	0	14	25	16	0	0	19	22	19	38	12	30	0	0	25	14	0	0	12	30	0	0	0	0	0	0	0	0	0	0
65	33	28	0	0	21	0	136	18	114	32	71	20	0	23	40	0	21	15	23	30	22	26	0	0	0	41	18	0	29	29	37	22	0	19	49	17	13	0	0	0	0	0	0	0	0	0	0	0	0
66	17	21	23	25	20	26	112	25	205	21	63	139	20	29	32	21	25	14	22	26	16	36	26	19	20	32	37	16	40	28	33	23	24	12	0	0	0	0	0	0	0	0	0	0	0	0	0	0	0
[truncated: 55 more columns]

## Sheet: ONT_35,000
Sample	Cyanothece_sp._PCC_7425	Moorea_producens	Ilumatobacter_nonamiensis	Desulfomonile_tiedjei	Paenibacillus_koleovorans	Paenibacillus_swuensis	Stenotrophomonas_maltophilia	Paraburkholderia_phymatum	Luedemannella_helvata	Micromonospora_yangpuensis	Pilimelia_columellifera	Geothrix_fermentans	Denitratisoma_oestradiolicum	Caldimonas_hydrothermale	Legionella_pneumophila	Thermodesulforhabdus_norvegica	Geitlerinema_sp._PCC_7407	Acidisarcina_polymorpha	Paenibacillus_sp._DCT19	Paenibacillus_albus	Azospirillum_sp._TSA2s	Pseudarthrobacter_sp._NIBRBAC000502772	Thermotomaculum_hydrothermale	Streptomyces_fungicidicus	Vampirovibrio_chlorellavorus	Trichodesmium_erythraeum	Thermoflavimicrobium_dichotomicum	Ammonifex_degensii	Paraburkholderia_terrae	Anaeromyxobacter_dehalogenans	Thiobacillus_denitrificans	Nitrospira_lenta	Microlunatus_sp._KUDC0627	Paenibacillus_hispanicus	Desulfovibrio_magneticus	Desulfobacca_acetoxidans	Lysobacter_ginsengisoli	Gemmatimonas_aurantiaca	Pseudomonas_sp._NC02	Syntrophus_aciditrophicus	Cohnella_candidum	Bacillus_gibsonii	Paenibacillus_polymyxa	Hydrogenispora_ethanolica	Bacillus_thermolactis	Anaeromyxobacter_sp._K	Cupriavidus_pinatubonensis	Paraburkholderia_caribensis	Acidimicrobium_ferrooxidans
19	0	0	23	0	32	37	399	0	28	0	0	0	61	0	0	0	48	0	30	0	20	0	0	0	0	0	0	0	0	17	0	0	140	26	38	0	0	0	17	0	0	0	23	0	0	30	0	0	0
20	0	0	22	26	0	24	65	0	29	0	0	0	74	0	0	0	33	0	39	0	29	29	0	0	0	0	0	0	0	19	0	0	131	18	28	0	0	0	19	0	0	0	0	0	0	31	0	0	0
21	0	0	22	0	19	27	62	0	23	0	0	0	78	0	0	0	32	0	31	0	30	17	0	0	0	0	0	0	0	16	0	0	114	0	32	0	0	0	11	0	0	0	0	0	0	22	0	0	0
22	0	0	21	17	15	0	67	0	45	0	0	0	115	0	0	0	0	0	22	0	40	25	0	0	0	0	0	0	0	39	0	0	102	13	47	0	0	11	0	0	0	0	0	0	0	26	0	0	0
23	0	0	12	25	13	21	127	0	40	0	24	0	71	0	0	0	32	0	0	15	38	28	0	0	29	0	0	0	0	33	0	0	129	0	32	0	0	25	27	0	0	22	0	0	0	25	0	0	0
24	0	0	28	29	20	0	130	0	43	0	21	0	75	15	0	0	33	0	0	0	0	19	0	0	0	0	0	0	0	37	0	0	96	0	68	20	0	19	0	0	0	17	0	0	0	34	0	0	0
25	0	0	18	30	18	38	98	0	36	0	27	0	56	0	0	0	22	0	0	0	32	23	0	0	0	0	0	0	0	24	0	0	128	0	31	0	0	0	12	13	0	0	0	0	0	30	0	0	0
26	0	0	0	0	14	22	40	0	0	0	0	0	39	0	0	0	0	0	0	17	0	23	0	0	12	0	0	0	0	24	0	0	62	0	0	0	0	0	0	0	0	15	0	0	0	24	0	0	0
27	0	0	12	22	21	26	49	0	34	0	0	0	72	0	0	0	27	0	0	0	17	16	18	0	17	0	0	0	0	37	0	0	76	0	26	0	0	22	0	0	0	0	0	0	0	30	0	0	0
28	0	0	13	30	0	0	28	0	33	0	0	0	66	0	0	0	23	0	18	0	22	22	0	0	0	0	0	0	0	29	0	0	75	0	19	14	0	17	0	0	0	0	0	0	0	36	0	0	0
29	0	0	20	34	15	0	25	0	49	0	26	0	85	22	0	0	0	0	0	0	0	0	12	0	12	0	0	24	0	27	0	15	79	0	16	0	28	37	0	0	0	13	0	0	0	23	0	0	0
30	0	0	0	0	18	30	77	0	17	0	0	0	68	0	0	0	37	0	16	17	27	16	0	0	23	0	0	0	0	39	0	0	56	25	0	0	22	13	11	0	0	21	30	0	0	29	0	0	0
31	0	0	0	41	0	0	112	0	42	41	0	0	62	0	0	0	59	0	20	0	0	0	25	0	0	0	20	0	0	25	0	36	0	0	0	0	0	27	0	0	12	0	0	0	0	65	0	0	48
32	0	0	0	29	0	0	46	0	46	0	0	15	91	21	0	0	22	14	80	0	0	0	0	0	0	0	0	0	0	26	0	29	0	0	0	0	0	27	0	0	0	0	42	22	0	51	0	0	46
33	0	0	0	20	0	0	54	0	53	49	0	0	80	32	21	0	26	0	82	0	0	17	23	0	0	0	15	0	0	13	0	29	0	0	0	0	0	23	0	0	0	0	0	0	0	57	0	0	48
34	0	0	0	47	0	0	75	0	62	0	21	25	145	36	32	0	0	0	0	0	0	0	45	0	0	0	0	0	0	12	0	35	0	0	0	0	0	38	0	0	20	0	27	0	0	46	0	0	40
35	0	0	0	30	0	0	88	0	44	36	33	0	71	25	37	0	0	0	0	0	0	0	0	0	0	0	0	22	0	35	0	32	0	0	0	0	0	37	0	0	20	0	0	25	0	102	0	0	71
36	0	0	0	0	0	0	97	0	55	43	21	0	93	30	21	0	0	0	0	0	0	19	20	0	0	0	0	0	0	0	0	27	0	0	0	0	0	23	0	0	0	0	0	0	0	96	15	0	77
37	0	0	14	23	0	0	42	0	33	0	21	0	56	20	28	0	0	0	0	0	0	33	20	0	0	0	0	0	0	22	0	16	0	0	0	0	0	55	0	0	0	0	0	0	0	27	0	0	38
38	0	0	20	0	0	0	26	0	0	38	0	24	49	22	0	0	0	0	0	0	0	19	17	0	0	0	28	0	0	18	0	16	0	0	0	0	0	39	0	0	0	0	0	34	0	22	0	0	24
39	0	0	0	31	0	0	60	0	31	47	0	34	42	22	0	0	0	21	0	0	0	18	71	0	0	0	0	0	0	28	0	0	0	0	0	20	25	45	0	0	0	0	0	60	0	21	0	0	26
40	0	0	13	22	0	0	31	0	40	45	29	18	55	30	0	0	48	0	0	0	0	39	19	38	0	0	0	0	16	27	0	0	0	0	0	0	0	48	0	0	0	0	0	0	0	19	0	0	31
41	0	0	22	20	0	0	106	0	56	37	19	0	48	33	0	0	0	0	0	0	0	23	0	0	0	0	0	0	13	20	0	17	27	0	0	0	0	43	27	0	0	0	0	0	0	45	0	0	35
42	0	0	0	19	0	0	107	0	52	46	17	33	39	30	0	0	0	0	0	0	0	51	36	0	0	0	0	0	0	19	0	23	18	0	0	0	0	33	18	0	0	0	20	0	0	44	0	0	39
43	0	0	25	0	0	0	13	0	28	0	0	0	37	0	39	0	0	0	0	19	0	0	18	0	0	0	0	19	0	0	0	21	17	0	0	0	23	64	0	0	0	0	0	0	0	28	0	0	24
44	0	0	16	27	0	0	20	0	24	32	17	0	48	0	35	0	0	0	0	0	0	0	0	0	0	0	0	20	14	15	0	12	34	0	0	0	0	52	0	0	0	0	0	0	0	30	0	0	36
45	0	0	25	26	0	0	31	0	20	21	16	51	65	23	0	0	0	0	0	0	0	27	12	0	0	0	0	36	0	0	0	0	19	0	0	20	0	54	0	0	0	0	0	0	0	20	17	0	25
46	0	0	19	29	0	33	32	0	51	27	26	0	46	25	0	0	0	0	0	0	0	23	0	0	0	0	25	43	0	0	0	19	25	0	0	18	0	59	15	0	0	0	0	0	0	39	0	0	60
47	0	0	16	18	0	0	18	0	32	0	32	0	38	0	0	0	0	0	0	0	0	0	17	0	0	0	0	23	0	0	0	19	0	0	0	0	0	69	0	0	0	0	0	0	0	28	0	0	55
48	0	0	31	30	0	0	25	0	41	35	53	0	61	28	0	0	0	0	0	0	0	17	0	0	0	0	24	38	0	19	0	26	20	0	0	0	0	95	0	0	0	0	0	0	0	46	19	0	79
49	0	0	21	0	0	0	22	0	0	0	0	0	90	41	0	0	0	0	0	0	0	0	14	0	0	0	0	0	0	37	0	0	0	0	0	0	0	22	0	0	0	0	0	0	0	0	0	0	0
50	0	0	0	0	0	31	751	0	0	0	0	0	83	37	0	0	19	0	0	0	0	0	13	0	0	0	0	0	14	0	0	0	0	0	0	0	15	0	0	0	0	0	0	0	0	0	0	0	0
51	0	0	29	31	0	0	46	17	33	0	0	20	148	33	0	0	0	0	0	0	0	0	21	0	0	0	0	0	27	34	25	0	0	0	0	19	30	40	0	0	0	0	0	0	0	27	0	17	0
52	81	16	35	36	0	0	60	0	91	25	16	0	122	34	35	27	0	36	0	0	19	0	19	52	0	0	15	38	0	22	0	0	42	0	0	19	17	44	30	15	0	0	0	13	0	14	19	19	0
53	0	0	41	0	0	22	51	23	30	0	0	0	222	42	0	0	22	0	0	0	0	32	25	48	15	0	0	32	25	41	32	14	0	0	0	21	19	37	14	21	18	0	0	0	0	24	0	19	0
54	0	0	41	29	0	25	49	25	50	34	0	0	174	45	0	0	26	0	0	14	31	0	25	0	20	0	0	27	15	44	26	13	0	0	0	14	38	28	0	17	19	0	0	0	0	19	0	15	0
55	59	0	66	18	0	0	21	0	49	0	0	22	103	31	42	0	27	31	0	0	21	57	33	0	0	0	0	0	18	39	25	0	17	0	0	20	0	34	0	0	0	0	0	0	0	0	0	0	0
56	146	29	61	36	0	41	64	0	69	33	0	17	119	30	32	0	35	28	27	0	39	34	53	33	13	0	0	24	23	35	24	0	24	0	27	35	0	24	0	0	16	0	24	17	0	0	0	0	0
57	131	22	58	24	0	0	46	0	62	0	15	0	110	38	37	18	27	31	0	0	0	31	25	0	12	0	18	17	23	46	31	0	27	0	15	23	0	14	27	0	0	0	0	0	0	0	0	0	0
58	128	24	38	50	0	34	155	18	122	29	39	18	123	28	24	26	0	33	0	0	0	20	27	51	0	20	27	31	25	17	17	0	51	0	21	18	17	37	27	13	36	0	0	26	0	18	28	0	0
59	155	27	60	30	13	27	63	0	76	0	16	16	143	31	0	29	29	25	24	19	22	19	31	57	0	17	25	29	25	35	0	0	28	0	20	0	0	31	0	16	15	0	0	15	0	0	14	0	0
60	112	15	41	27	0	29	37	17	108	43	16	15	120	28	0	23	0	41	21	0	37	22	30	39	11	14	19	26	19	0	0	0	27	0	24	25	17	34	0	14	18	0	0	0	0	0	25	0	0
61	744	112	31	24	19	0	94	36	46	0	0	0	133	48	28	26	71	14	0	22	33	0	0	0	15	54	0	47	0	0	30	0	23	32	0	0	0	13	0	0	0	15	17	11	0	0	0	25	0
62	308	25	31	29	13	25	290	58	50	0	17	0	156	56	0	27	23	0	22	13	23	14	22	0	18	31	44	31	0	0	22	22	22	31	16	16	29	13	33	0	0	99	0	28	0	0	18	24	0
63	326	45	52	33	12	0	468	41	37	0	0	0	156	54	28	24	41	19	0	16	24	24	20	0	13	27	13	20	23	0	19	27	24	19	0	0	21	0	35	0	0	17	28	18	0	0	15	21	0
64	413	61	47	28	26	33	58	25	69	26	21	0	134	35	0	26	33	30	0	0	0	38	26	0	0	28	16	32	13	32	0	13	22	0	19	17	0	29	24	19	21	0	22	14	12	0	13	11	0
65	141	27	41	27	13	24	41	21	62	0	24	17	141	40	0	42	31	23	0	0	23	0	32	0	0	0	29	28	18	19	17	20	17	0	24	22	0	33	0	22	27	18	22	23	18	25	20	17	14
66	254	36	50	38	17	40	168	45	74	35	18	18	158	44	28	39	26	22	25	13	36	21	32	40	23	19	38	45	13	35	13	20	36	22	21	32	17	20	25	21	23	11	23	19	11	0	0	0	0
[truncated: 86 more columns]

## Sheet: PacBio_10,000
Sample	Frankia_inefficax	Catenulispora_acidiphila	Nocardia_seriolae	Cylindrospermum_stagnale	Thermodesulfovibrio_yellowstonii	Reyranella_graminifolii	Thermobaculum_terrenum	Dissulfurimicrobium_hydrothermale	Desulfuromonas_thiophila	Geobacter_pickeringii	Chondromyces_crocatus	Afifella_pfennigii	Dongia_mobilis	Desulfuromonas_soudanensis	Roseiflexus_castenholzii	Planctomycetes_bacterium_Pan265	Patulibacter_medicamentivorans	Schlegelella_thermodepolymerans	Candidatus_Methylopumilus_turicensis	Mycetohabitans_rhizoxinica	Anaerolinea_thermophila	Reyranella_massiliensis	Chthonomonas_calidirosea	Nitrolancea_hollandica	Ferruginibacter_alkalilentus	Candidatus_Nitrospira_inopinata	Catenuloplanes_niger	Geobacter_bemidjiensis	Verrucomicrobium_spinosum	Prosthecobacter_fluviatilis	Pelolinea_submarina	Castellaniella_defragrans	Nocardioides_pakistanensis	Terrabacter_lapilli	Singulisphaera_rosea	Ktedonosporobacter_rubrisoli	Pelobacter_acetylenicus	Thermodesulfovibrio_aggregans	Candidatus_Saccharibacteria_bacterium_oral_taxon_955	Pandoraea_thiooxydans	Paraburkholderia_sp._SOS3	Pseudonocardia_dioxanivorans	Prosthecobacter_dejongeii	Sporichthya_polymorpha	Angustibacter_aerolatus	Mycetohabitans_endofungorum	Stenotrophobacter_roseus	Kribbella_flavida	Azospirillum_brasilense
19	112	29	0	0	0	0	34	0	55	36	0	24	0	0	0	0	0	0	0	0	0	0	0	38	29	19	0	20	0	0	0	0	0	0	0	0	18	0	0	0	0	27	0	22	0	0	0	24	0
20	126	27	0	0	19	0	46	0	63	31	0	41	0	0	0	0	0	0	0	29	0	0	0	39	18	0	0	14	0	0	0	0	29	17	0	0	0	0	0	0	0	27	0	0	13	0	29	17	0
21	138	0	0	0	0	0	51	0	55	36	0	18	0	0	0	0	0	0	0	0	0	14	0	55	20	15	0	36	0	0	0	0	26	0	0	0	0	0	0	0	0	23	0	0	0	0	22	23	0
22	155	27	0	0	0	0	54	0	67	49	0	0	0	0	21	0	0	0	0	0	0	0	0	54	23	15	0	26	0	0	0	0	33	0	0	0	0	0	0	0	0	24	0	0	0	0	16	30	0
23	108	28	0	0	0	0	58	0	66	37	0	40	0	0	0	0	0	39	0	0	0	19	0	53	0	15	0	25	0	0	0	0	0	0	0	0	0	0	0	0	0	22	17	25	0	0	0	0	0
24	88	23	0	0	20	0	60	0	43	44	16	22	15	0	14	0	0	47	0	0	0	26	0	43	26	0	0	29	14	19	0	0	24	0	0	0	0	19	0	0	0	28	16	17	14	0	0	16	0
25	131	24	0	0	18	0	50	0	59	43	0	22	15	0	0	0	0	28	0	0	0	25	0	40	17	0	0	25	0	0	0	0	0	0	0	0	0	21	0	0	0	16	21	26	0	0	0	31	0
26	112	31	0	71	0	0	44	0	52	24	0	26	0	0	15	0	0	0	0	22	0	31	0	43	23	0	0	24	13	0	0	0	0	0	0	0	0	0	0	0	0	21	0	0	0	0	0	21	0
27	113	21	0	45	30	0	54	0	56	21	22	0	0	0	0	0	0	0	0	0	0	21	0	36	15	0	0	26	0	16	0	0	0	0	0	12	0	0	0	0	0	34	17	24	17	0	0	21	0
28	91	16	0	0	28	0	62	0	75	56	16	28	22	0	0	0	0	41	0	0	0	26	0	54	23	0	20	35	17	11	0	0	0	0	0	0	0	21	0	0	0	30	17	0	11	0	21	17	0
29	86	18	0	0	36	0	95	14	79	31	38	28	20	0	23	17	0	0	0	26	14	29	0	54	24	13	0	49	22	0	0	0	0	0	0	0	0	24	0	0	0	0	26	0	14	0	16	15	0
30	118	22	0	46	0	0	36	0	36	0	22	0	0	0	0	0	0	27	0	0	0	18	0	32	25	0	0	28	0	0	0	0	0	0	0	16	0	0	0	0	0	39	0	0	18	24	0	21	0
31	0	27	0	0	0	0	127	0	158	0	0	41	0	0	0	16	0	0	0	0	0	0	0	164	0	34	0	0	0	0	0	0	38	0	0	0	81	0	0	0	0	0	54	16	0	0	56	0	0
32	0	47	0	0	0	0	127	0	135	0	0	54	0	0	0	21	0	0	0	0	14	0	14	156	0	16	0	0	0	17	21	0	0	0	0	0	66	0	0	0	0	0	53	0	0	0	26	0	0
33	0	39	0	0	0	0	105	0	138	18	0	58	0	0	0	0	0	0	0	0	19	0	25	136	0	15	0	0	22	19	0	0	27	0	0	0	43	0	0	0	0	0	41	0	0	0	24	0	0
34	0	29	0	0	0	0	111	0	205	0	19	49	0	0	0	32	0	0	0	0	0	0	0	129	0	36	0	0	0	0	0	0	18	0	0	0	78	31	24	0	0	0	51	0	0	0	0	0	0
35	0	41	0	0	0	0	161	23	191	21	18	55	0	0	0	26	0	0	0	0	17	0	13	99	0	20	0	35	0	20	0	0	0	0	0	0	55	36	0	0	0	0	20	24	0	0	16	0	0
36	0	53	0	0	0	0	177	26	180	18	0	31	0	0	0	36	0	0	0	0	14	0	25	121	0	0	22	34	18	19	0	0	15	0	0	0	39	0	0	0	0	0	24	21	0	0	23	0	0
37	0	30	0	0	0	0	95	17	87	0	37	34	0	0	24	18	0	35	0	0	0	0	14	76	51	0	28	44	23	0	0	0	34	0	0	0	0	0	0	0	0	0	24	19	0	0	29	0	0
38	0	25	0	0	0	0	69	21	64	0	41	22	0	0	23	0	0	44	0	0	0	0	0	75	50	0	0	37	17	0	0	0	29	0	0	0	0	0	0	0	0	15	16	25	0	0	32	0	0
39	0	22	0	0	0	0	90	22	53	0	49	24	0	0	0	0	0	0	0	0	0	0	0	88	58	0	0	71	0	0	0	0	40	0	0	0	0	0	23	0	0	20	17	16	0	0	49	32	0
40	0	35	0	37	37	0	121	30	43	14	42	24	19	0	19	16	0	0	0	0	14	0	0	59	31	0	0	35	23	0	0	0	23	0	0	0	24	0	23	0	0	0	22	0	0	0	25	16	0
41	0	30	0	0	0	0	111	0	44	0	19	32	0	0	25	20	0	43	0	0	13	0	0	77	36	0	32	49	22	0	26	0	0	0	0	0	31	28	0	0	0	0	16	15	0	0	51	24	0
42	0	29	0	0	0	0	119	17	61	25	30	38	0	0	0	21	0	33	0	0	0	0	0	66	35	0	24	38	18	0	0	0	29	0	0	0	20	44	0	0	0	0	21	30	0	0	28	23	0
43	0	16	0	0	48	0	111	20	59	0	53	46	16	0	0	24	0	35	0	0	0	21	0	48	64	0	26	56	18	0	28	0	0	0	0	0	0	0	0	0	0	14	0	23	0	0	0	0	0
44	0	26	0	0	0	0	103	35	65	0	20	35	15	26	16	22	0	0	0	0	0	0	0	38	27	0	29	56	25	0	0	0	27	0	0	0	0	0	26	0	0	18	0	22	0	0	16	14	0
45	0	18	0	0	36	0	92	24	28	0	52	31	16	17	0	25	0	28	0	0	0	15	0	48	24	23	23	52	0	0	0	0	27	0	0	0	37	0	0	0	0	0	15	0	0	0	25	0	0
46	0	29	0	21	25	0	190	12	82	18	42	53	0	23	19	23	0	0	0	0	14	0	0	78	41	0	0	60	15	0	28	0	0	0	0	0	27	17	28	0	0	0	16	17	0	0	14	17	0
47	0	34	0	0	46	0	194	0	110	0	42	54	0	42	0	37	0	0	0	0	17	0	0	73	0	0	0	37	22	0	0	0	0	0	0	0	45	27	40	0	0	0	23	0	0	0	22	0	0
48	0	25	0	0	47	0	190	14	92	18	39	52	0	32	0	34	0	0	0	0	0	0	0	57	36	25	21	70	0	0	0	0	0	0	0	0	22	24	17	0	0	0	0	15	0	0	44	0	0
49	44	0	39	0	38	20	100	21	35	13	0	0	0	0	63	0	28	53	0	47	18	0	41	57	72	18	0	35	0	20	0	0	22	57	26	15	28	0	0	20	0	32	28	0	43	40	0	0	0
50	0	0	51	0	0	15	94	13	30	0	16	0	0	0	60	0	21	37	0	45	18	25	43	44	81	0	0	36	0	22	0	0	18	28	25	16	27	0	0	18	15	24	31	30	25	25	13	27	0
51	0	0	44	0	30	0	104	30	71	0	27	0	0	0	61	0	30	30	0	51	19	15	56	73	57	0	0	0	15	32	0	0	28	40	22	19	0	0	0	16	28	0	39	27	17	27	15	40	0
52	76	36	72	135	49	16	195	0	41	0	33	0	0	26	43	0	31	39	29	39	31	24	35	61	61	0	0	22	15	23	31	0	36	22	0	11	30	0	0	0	26	0	17	39	0	0	0	26	22
53	0	0	42	0	36	15	95	26	26	17	27	0	0	0	44	0	22	35	0	71	22	0	41	52	55	23	0	17	0	13	0	15	20	36	22	0	34	0	0	21	18	0	39	29	37	22	0	26	0
54	34	0	40	0	25	0	99	21	37	16	46	0	0	0	54	0	16	31	0	52	22	29	50	47	56	17	0	33	0	25	0	0	19	44	26	17	27	0	0	16	18	20	28	22	24	34	15	0	0
55	46	22	42	135	30	24	75	0	27	0	47	0	19	24	30	13	23	39	0	18	20	28	35	34	67	0	22	43	22	12	13	0	22	0	15	0	0	0	0	0	17	25	33	28	17	40	0	0	0
56	43	24	51	297	0	0	99	20	47	0	37	0	0	0	31	0	34	29	0	35	28	32	46	51	81	0	0	24	20	32	16	0	36	21	0	19	0	0	0	22	0	18	35	0	21	0	0	0	14
57	46	0	55	198	40	18	103	20	29	21	64	0	45	0	50	0	31	34	22	20	29	28	34	30	58	0	0	0	0	28	21	0	24	0	12	0	0	0	0	0	25	0	34	34	22	25	0	27	0
58	40	42	58	232	30	0	120	22	50	26	25	0	13	26	43	0	21	35	34	28	0	23	18	49	67	18	0	0	0	26	19	15	0	0	0	0	32	23	0	15	16	0	29	0	0	23	0	25	14
59	45	26	85	331	51	14	110	20	32	22	27	0	0	23	46	0	22	31	33	26	25	23	38	51	39	0	0	35	17	22	15	16	33	0	0	17	28	0	0	34	0	18	21	22	0	0	0	23	27
60	74	26	78	165	39	0	151	23	45	0	19	0	0	19	37	0	30	36	37	46	22	31	31	55	53	0	0	34	11	31	29	22	31	0	0	17	26	30	0	0	30	0	16	0	19	0	0	0	14
61	34	27	32	1333	0	17	96	0	0	0	29	0	0	24	27	0	34	33	0	27	0	20	13	34	74	20	0	0	0	0	0	0	33	28	0	0	0	0	23	49	0	41	0	0	28	22	0	30	0
62	0	36	32	587	0	27	86	0	55	23	0	0	0	0	27	0	28	44	0	29	17	0	13	27	65	24	0	0	0	22	15	0	0	0	0	22	0	0	17	33	0	39	19	0	0	21	0	0	21
63	28	35	27	775	51	18	75	17	26	0	0	0	0	24	23	0	31	19	14	25	0	16	23	41	107	17	0	33	0	25	0	18	19	36	17	0	0	0	0	38	0	0	27	0	19	23	0	24	0
64	59	41	71	618	45	0	149	0	42	16	21	0	0	20	35	0	31	27	25	28	24	33	18	63	49	19	0	21	0	17	0	26	33	0	0	0	21	17	0	0	18	19	22	31	14	19	15	41	24
65	69	41	66	250	29	0	144	36	32	0	0	16	0	43	44	0	29	32	18	27	34	23	28	58	61	19	0	39	15	19	21	29	37	35	13	14	34	21	19	21	17	0	0	0	0	0	0	0	0
66	49	25	55	492	59	13	151	17	37	19	25	24	13	39	25	19	39	51	15	41	31	22	34	38	28	28	24	28	21	18	16	0	0	0	0	0	0	0	0	0	0	0	0	0	0	0	0	0	0
[truncated: 79 more columns]

## Sheet: PacBio_20,000
Sample	Roseiflexus_sp._RS_1	Cylindrospermum_stagnale	Catenulispora_acidiphila	Nocardia_seriolae	Desulfuromonas_soudanensis	Desulfuromonas_thiophila	Thermodesulfovibrio_yellowstonii	Thermodesulfovibrio_aggregans	Candidatus_Frankia_datiscae	Terrabacter_lapilli	Bradyrhizobium_lupini	Mycobacterium_barrassiae	Rubrobacter_bracarensis	Catenuloplanes_niger	Mycetohabitans_endofungorum	Mycetohabitans_rhizoxinica	Pelobacter_acetylenicus	Geobacter_pickeringii	Prosthecobacter_fluviatilis	Prosthecobacter_dejongeii	Verrucomicrobium_spinosum	Castellaniella_defragrans	Flavisolibacter_ginsengiterrae	Planctomycetes_bacterium_Pla133	Catellatospora_bangladeshensis	Candidatus_Kuenenia_stuttgartiensis	Phycisphaerae_bacterium_RAS2	Actinoplanes_sediminis	Desulfonatronum_zhilinae	Desulfonatronum_thiosulfatophilum	Paraburkholderia_sp._SOS3	Candidatus_Methylopumilus_turicensis	Nocardioides_iriomotensis	Nocardioides_daejeonensis	Thermosulfidibacter_takaii	Streptomyces_venezuelae	Streptomyces_sp._P3	Nocardioides_sp._SB3_45	Nocardioides_pakistanensis	Azospirillum_brasilense	Rhodoplanes_serenus	Candidatus_Saccharibacteria_bacterium_oral_taxon_955	Rhizomicrobium_electricum	Dissulfurimicrobium_hydrothermale	Lysinibacillus_endophyticus	Ktedonosporobacter_rubrisoli	Anaerolinea_thermophila	Desulfovibrio_putealis	Actinocorallia_glomerata
19	0	0	45	0	0	93	28	0	31	0	0	0	13	0	0	33	25	62	0	0	0	0	0	0	0	0	0	0	0	0	0	0	0	0	0	28	29	0	42	0	0	0	0	0	29	0	0	14	0
20	0	0	39	0	0	87	0	0	26	33	0	0	0	0	0	41	20	58	13	23	19	0	17	0	0	0	0	0	0	0	0	0	0	0	0	26	32	0	34	0	0	0	0	0	25	18	0	16	0
21	0	0	36	0	16	93	16	23	25	0	0	0	20	0	0	33	17	59	0	16	19	0	0	0	0	14	0	0	0	0	0	0	16	0	0	0	26	0	25	0	0	0	0	0	21	0	18	29	0
22	0	0	51	0	0	109	57	0	26	0	0	0	14	0	17	24	24	66	20	19	0	0	16	0	0	0	0	0	0	0	0	15	0	0	0	30	0	0	37	0	0	0	13	17	23	13	14	29	0
23	0	0	44	0	21	112	34	28	0	0	0	0	0	0	27	22	25	54	0	32	17	0	22	0	0	17	0	0	0	0	0	15	0	0	0	30	0	0	22	20	0	0	0	0	25	13	0	13	0
24	0	47	51	0	0	100	34	19	20	0	0	0	32	0	0	0	26	61	21	29	47	0	0	0	0	22	0	0	0	0	0	0	0	0	0	365	0	0	42	0	0	0	16	16	22	0	17	38	0
25	0	0	49	0	0	113	28	21	17	0	0	0	17	25	0	0	23	58	16	17	18	0	0	0	0	17	0	0	0	0	0	14	0	0	0	44	0	0	22	0	0	0	0	0	40	0	14	24	0
26	0	118	36	0	0	102	35	0	19	0	0	0	13	0	0	26	0	32	13	28	15	15	26	0	0	16	0	0	0	0	0	17	0	0	0	29	0	0	0	0	0	0	0	0	29	0	0	17	0
27	0	63	25	0	0	87	23	15	15	0	0	0	14	0	0	0	0	32	14	23	31	0	26	0	0	17	0	0	0	0	0	0	0	0	0	49	17	0	31	23	0	0	0	0	26	14	18	21	0
28	0	0	34	0	0	142	44	22	25	0	0	0	0	25	0	0	30	81	17	31	17	0	0	0	0	0	0	0	0	0	0	14	0	0	0	35	0	0	0	0	0	0	0	0	15	0	0	23	0
29	0	0	31	0	21	121	57	52	13	0	0	0	0	0	31	24	30	52	24	36	30	0	26	0	0	42	12	0	0	0	0	0	0	0	0	28	0	0	0	0	0	0	0	30	31	0	26	0	0
30	0	44	24	0	0	54	39	0	26	36	0	0	18	0	25	14	19	0	20	0	18	0	0	0	0	0	0	55	0	0	17	0	44	0	0	34	0	0	29	23	0	0	0	0	14	34	16	15	0
31	0	0	46	0	0	289	0	0	0	0	0	0	0	0	0	0	121	22	25	113	32	0	35	0	0	0	0	0	0	0	0	0	0	44	0	0	0	0	48	0	0	22	0	0	0	0	0	0	0
32	0	0	84	0	0	232	0	34	24	0	0	0	0	17	0	0	103	21	36	91	22	0	25	0	0	17	0	0	0	0	0	0	0	65	0	0	0	18	48	15	0	0	0	24	14	0	27	0	0
33	0	28	70	0	0	251	0	25	0	0	0	0	0	21	0	0	88	32	29	66	28	0	22	0	0	14	0	0	0	0	0	0	0	51	0	0	0	15	58	0	0	0	0	30	0	0	22	0	0
34	0	20	50	0	23	339	0	54	0	0	0	0	0	17	0	0	113	22	0	64	22	0	0	0	0	27	17	0	0	0	0	0	0	36	0	0	0	21	28	16	0	20	0	26	0	0	12	0	0
35	0	0	69	0	16	299	28	32	0	0	0	0	0	24	0	0	125	32	35	51	18	0	0	0	0	52	15	0	0	0	0	0	0	25	0	0	0	23	28	0	0	25	0	33	0	0	33	0	0
36	0	0	86	0	29	280	28	26	17	0	0	0	0	44	0	0	81	31	31	41	25	0	0	0	0	20	0	0	0	0	0	0	0	25	0	0	0	30	28	0	0	0	15	36	0	0	39	0	0
37	0	0	43	0	13	123	24	26	27	0	0	0	0	33	0	0	29	16	19	23	32	0	29	0	0	0	0	0	0	0	15	0	0	22	0	0	0	28	27	0	0	0	13	25	0	0	15	0	21
38	0	18	47	0	0	77	20	20	37	0	0	0	0	0	0	0	28	16	0	25	27	0	35	0	0	0	0	28	0	0	0	0	0	24	0	0	0	0	34	0	0	25	12	28	0	0	0	0	0
39	0	0	22	0	0	74	0	35	31	0	17	0	0	21	0	0	0	22	0	36	18	0	45	0	0	0	0	0	0	0	0	0	0	21	0	0	0	0	49	0	0	26	17	38	0	13	0	0	0
40	0	35	37	0	19	85	53	0	40	0	0	0	0	29	0	0	48	31	0	44	27	0	33	0	0	16	0	0	0	0	19	0	0	35	0	0	0	19	35	0	0	34	0	37	0	0	16	0	13
41	13	0	50	0	0	91	18	32	30	0	0	0	0	49	0	0	51	37	0	26	30	0	33	0	0	21	0	0	0	0	19	0	0	24	0	0	0	36	28	0	0	34	0	23	0	0	17	0	0
42	0	0	55	0	32	97	26	24	26	0	0	0	0	46	0	0	31	34	0	23	21	0	24	0	0	24	0	11	0	0	0	0	0	32	0	0	0	37	35	0	0	0	0	37	0	0	0	0	0
43	0	0	23	0	19	55	53	0	0	0	22	0	0	22	0	0	18	17	0	23	16	0	29	12	0	16	16	32	0	0	32	15	0	21	0	0	0	38	27	0	0	34	0	28	0	0	12	0	0
44	0	0	36	0	21	81	25	23	0	0	0	0	0	31	0	0	21	15	11	18	30	0	31	0	0	22	18	26	0	0	0	0	0	14	0	0	0	27	30	0	0	37	0	50	18	0	18	0	0
45	0	17	31	0	18	59	47	18	0	0	0	0	0	35	0	0	36	28	0	37	15	0	21	28	0	17	0	34	0	0	0	0	0	16	0	0	0	35	24	0	0	20	18	44	0	0	23	0	0
46	0	27	57	0	40	150	64	40	0	0	0	0	0	29	0	0	40	35	0	31	28	0	18	22	0	21	18	0	0	0	0	0	0	0	0	0	0	52	34	0	0	49	17	19	0	0	38	0	0
47	0	17	41	0	81	158	78	55	32	0	0	0	0	16	0	0	47	29	0	32	30	0	0	14	0	20	0	0	0	0	0	0	0	0	0	0	0	26	32	0	0	42	0	24	0	0	16	0	0
48	0	0	46	0	43	178	99	51	38	0	0	0	0	25	0	0	45	34	16	22	27	0	21	20	0	20	18	0	0	0	0	0	0	0	0	0	0	36	21	0	0	22	14	22	0	0	20	0	0
49	22	28	22	76	22	28	49	0	0	80	14	37	22	18	63	94	50	26	34	56	17	19	25	0	0	23	0	19	0	0	22	23	20	0	25	0	0	52	38	29	16	0	23	36	0	28	25	0	0
50	22	0	21	67	0	33	47	0	0	66	32	27	20	21	39	89	42	23	32	56	23	0	33	0	0	16	11	37	0	0	29	0	30	0	0	0	23	58	42	16	19	0	22	35	0	33	25	0	0
51	27	27	24	67	28	51	41	0	0	61	17	39	27	0	45	102	38	20	39	63	19	0	36	0	0	14	0	30	0	0	29	24	28	0	14	31	0	58	39	24	18	0	28	44	0	22	26	0	0
52	14	280	51	122	42	61	62	26	0	33	0	0	32	17	22	49	43	24	43	35	38	26	18	0	30	32	28	26	14	14	24	44	13	24	0	0	0	39	45	36	12	0	18	35	0	33	48	25	20
53	20	0	16	88	31	43	57	0	0	72	38	43	17	22	49	130	59	28	24	60	25	24	31	0	33	18	0	32	0	0	30	20	24	0	29	0	0	47	33	27	22	0	26	62	0	28	37	0	0
54	19	0	25	82	28	48	51	0	12	72	24	52	21	0	57	110	38	23	24	52	20	0	28	0	26	16	0	41	0	16	22	19	28	14	15	0	0	51	32	22	19	0	29	50	0	47	31	0	0
55	12	248	53	76	23	39	40	0	0	40	23	0	22	26	52	27	0	21	25	53	29	0	26	0	0	0	0	22	0	0	38	21	13	28	0	38	0	25	33	22	0	0	30	27	0	15	34	0	27
56	26	570	41	95	20	41	62	0	0	36	25	36	37	21	22	40	30	0	35	48	43	20	33	0	0	13	0	19	0	0	19	15	21	16	0	0	0	29	49	35	0	0	34	40	0	25	52	15	27
57	13	348	28	95	23	35	47	0	0	32	45	0	20	19	25	44	24	20	27	42	27	0	17	0	0	14	0	13	0	0	25	29	20	22	0	22	0	33	39	22	0	23	24	28	0	0	32	13	18
58	13	459	76	122	56	71	55	33	0	27	19	25	16	23	38	36	42	37	33	35	20	23	24	0	0	26	0	0	0	32	45	65	0	19	18	0	0	25	35	34	13	0	12	44	29	18	39	13	16
59	21	582	55	135	27	64	62	22	0	30	34	0	15	0	21	31	41	28	40	32	23	34	29	0	36	20	15	20	14	15	17	49	12	13	32	0	0	24	24	37	16	0	17	34	29	20	50	23	22
60	28	372	49	144	35	90	46	31	0	26	0	0	19	28	38	36	48	28	46	37	31	31	24	0	27	20	26	18	31	21	29	41	12	0	24	0	0	25	30	25	17	0	0	39	0	23	48	18	26
61	0	2584	48	67	27	29	29	0	0	28	21	0	21	18	22	52	0	27	0	23	0	28	0	0	0	0	0	0	0	0	23	12	0	27	0	34	0	57	33	19	0	28	26	25	22	11	14	0	16
62	0	1048	60	38	31	46	54	17	0	49	59	41	0	0	23	54	0	21	27	35	17	0	0	0	0	13	0	0	0	0	26	20	0	0	0	0	0	49	30	30	14	26	45	25	0	58	23	14	21
63	0	1334	46	62	29	47	63	0	0	45	53	30	0	0	22	40	0	19	28	49	11	24	0	0	0	15	0	0	17	0	26	14	0	0	0	0	0	37	35	24	13	36	36	21	34	18	22	0	28
64	17	1164	66	123	36	67	56	14	0	33	21	27	24	26	20	38	39	32	24	44	23	43	0	0	35	0	11	30	19	0	43	43	11	25	33	37	0	30	31	39	15	18	0	41	0	21	39	15	18
65	31	492	52	109	60	53	86	26	18	36	0	45	21	23	15	41	34	32	35	38	29	36	19	0	18	22	16	21	30	13	34	40	0	0	36	39	19	26	39	47	0	25	25	63	0	23	60	14	12
66	32	916	45	108	58	58	76	29	20	37	39	19	13	30	14	42	36	26	25	27	26	34	14	22	32	18	15	55	30	24	23	35	23	22	24	53	28	24	33	30	19	17	20	40	18	19	47	20	15
[truncated: 131 more columns]

## Sheet: PacBio_25,000
Sample	Planctomycetes_bacterium_Pla133	Candidatus_Kuenenia_stuttgartiensis	Nocardioides_iriomotensis	Marmoricola_pocheonensis	Nocardioides_jensenii	Cylindrospermum_stagnale	Phycisphaerae_bacterium_RAS2	Bacillus_aryabhattai	Roseiflexus_sp._RS_1	Thermodesulfovibrio_yellowstonii	Thermosulfidibacter_takaii	Desulfosporosinus_orientis	Thermodesulfovibrio_aggregans	Schlegelella_thermodepolymerans	Bradyrhizobium_lupini	Desulfuromonas_michiganensis	Desulfuromonas_soudanensis	Catenulispora_acidiphila	Nocardia_seriolae	Mycolicibacterium_aurum	Dissulfurimicrobium_hydrothermale	Mycetohabitans_endofungorum	Mycetohabitans_rhizoxinica	Castellaniella_defragrans	Sideroxydans_lithotrophicus	Asanoa_ishikariensis	Aeromicrobium_ginsengisoli	Lysinibacillus_endophyticus	Pseudomonas_fluorescens	Streptomyces_cinnabarigriseus	Streptomyces_sp._CC0208	Ktedonosporobacter_rubrisoli	Thermosporothrix_hazakensis	Desulfuromonas_thiophila	Desulfonatronum_zhilinae	Desulfonatronum_thiosulfatophilum	Candidatus_Methylopumilus_turicensis	Actinoplanes_durhamensis	Anaerolinea_thermophila	Pseudomonas_syringae	Actinoplanes_sediminis	Catellatospora_bangladeshensis	Verrucomicrobium_spinosum	Candidatus_Frankia_datiscae	Streptomyces_sp._P3	Paraburkholderia_terricola	Geobacter_pickeringii	Prosthecobacter_dejongeii	Prosthecobacter_fluviatilis
19	0	12	20	18	0	0	0	68	0	37	0	0	0	0	0	0	0	71	0	0	0	0	37	0	0	0	0	32	0	0	0	0	0	121	0	0	0	0	0	0	0	0	0	31	35	0	84	15	0
20	0	17	0	23	28	0	0	0	0	18	0	16	13	34	0	0	0	55	0	0	26	13	36	0	0	0	0	22	0	0	0	19	0	124	0	0	15	0	14	0	0	0	16	24	0	0	70	25	0
21	0	18	14	18	15	35	0	63	0	22	0	0	26	30	0	0	0	52	0	0	17	17	35	0	0	0	0	21	0	0	0	13	0	117	0	0	12	0	20	0	0	0	18	33	33	0	73	25	0
22	0	0	0	21	0	30	0	28	0	55	0	0	0	41	0	0	0	62	0	0	21	19	23	0	0	0	0	25	0	0	0	19	0	141	0	0	16	0	20	0	0	0	0	37	0	0	74	17	28
23	0	29	0	0	0	0	0	13	0	35	0	0	27	41	0	0	0	62	0	0	0	21	24	0	0	0	0	21	0	0	30	13	0	141	0	0	16	0	21	0	0	0	15	16	0	0	77	36	18
24	0	28	0	16	23	56	0	54	0	50	0	29	31	50	0	0	13	53	0	0	19	0	0	0	0	0	0	23	0	0	0	0	0	102	0	0	14	0	22	0	0	0	47	22	0	0	68	35	31
25	0	22	0	0	0	0	0	39	0	37	0	15	32	32	0	0	21	59	0	0	0	28	0	0	0	0	0	34	0	0	0	0	0	123	0	0	21	0	15	0	0	0	19	19	0	0	77	30	17
26	0	12	0	20	0	144	0	16	0	25	0	0	19	34	0	0	23	52	0	0	0	0	32	0	0	0	11	40	0	0	51	0	0	107	0	0	21	0	0	0	0	0	25	14	0	0	40	28	0
27	0	21	0	0	0	61	0	17	0	30	0	0	25	37	0	0	0	46	0	0	15	30	0	0	0	0	0	22	0	0	0	24	0	98	0	0	16	0	16	0	0	0	36	23	20	0	46	30	20
28	0	0	0	0	0	0	0	0	0	50	0	21	38	58	0	0	16	46	0	0	0	28	0	0	0	0	0	26	0	0	0	0	0	142	0	0	21	0	16	0	0	0	25	21	0	0	100	37	31
29	0	42	0	0	0	0	16	14	0	62	0	46	66	45	0	0	23	37	0	0	39	53	0	0	0	0	0	23	0	0	0	0	0	138	0	0	0	0	33	0	0	0	33	25	0	0	50	47	33
30	0	18	45	0	0	55	0	44	0	35	0	0	12	37	24	0	0	34	0	0	0	26	14	0	0	0	0	20	0	0	0	37	0	77	0	0	14	0	22	0	32	0	16	24	34	0	15	12	14
31	0	0	0	35	0	0	0	13	0	0	0	0	0	0	0	0	0	57	0	0	0	0	0	0	0	0	0	0	0	0	0	0	0	340	0	0	0	0	12	0	0	0	38	30	0	0	28	143	29
32	0	17	0	20	0	0	0	0	0	0	0	0	32	0	0	13	14	109	0	0	27	0	0	0	0	0	0	19	0	0	0	0	0	308	0	0	0	0	34	0	0	0	34	23	0	0	18	111	39
33	0	20	0	40	0	33	0	16	0	0	0	0	32	25	0	0	21	89	0	0	36	0	0	0	0	0	0	0	0	0	0	0	0	323	0	0	0	0	30	0	0	0	37	17	0	0	35	89	39
34	16	26	0	0	0	26	21	12	0	25	0	0	52	0	0	25	32	46	0	0	19	0	0	0	0	0	0	0	0	0	0	0	0	387	0	0	0	0	15	0	0	0	24	0	0	0	29	86	13
35	15	44	0	0	0	0	13	0	0	45	0	26	43	0	0	19	15	97	0	0	34	0	0	0	0	0	0	0	0	0	0	0	0	374	0	0	0	0	46	0	0	0	24	20	0	0	38	51	39
36	0	19	0	20	0	0	15	0	0	26	0	41	26	0	0	18	36	111	0	0	39	0	0	0	0	0	0	0	0	0	0	0	0	360	0	0	0	0	42	0	0	0	32	21	0	0	46	56	41
37	0	19	0	0	0	0	0	0	12	22	0	0	41	51	0	0	22	48	0	24	40	0	0	0	0	0	50	0	0	0	0	0	0	145	0	0	14	0	16	0	0	0	38	28	0	0	30	37	20
38	0	25	0	0	0	15	0	0	0	26	0	0	22	45	0	0	0	56	0	0	41	0	0	0	18	0	24	0	0	0	0	0	0	87	0	0	0	12	0	0	19	0	30	0	0	0	28	50	0
39	0	24	14	13	0	23	0	0	0	0	0	0	47	38	0	0	0	32	0	0	41	0	0	0	0	0	53	0	0	0	0	0	0	83	0	0	0	0	14	0	21	0	25	37	0	0	26	32	0
40	0	29	0	0	0	42	0	0	15	32	0	18	20	47	0	0	22	57	0	27	51	0	0	0	13	0	30	0	0	0	0	0	0	113	0	0	0	0	27	0	0	0	41	40	0	0	36	43	0
41	0	19	0	0	0	0	0	0	14	26	0	0	44	45	0	17	17	45	0	0	27	0	0	0	16	0	41	0	0	0	0	0	0	98	0	0	0	0	25	0	0	0	38	23	0	0	48	39	0
42	15	24	0	0	24	0	0	0	0	32	0	21	34	25	0	0	35	62	0	28	32	0	0	0	16	0	42	0	0	0	0	0	0	119	0	0	0	0	14	0	19	0	22	30	0	0	44	44	12
43	15	20	0	0	22	18	25	0	0	61	17	35	0	25	0	0	26	32	0	33	41	0	0	0	0	29	0	0	0	0	0	0	0	67	0	0	0	0	16	0	34	0	22	0	0	0	25	22	0
44	0	26	0	0	0	0	15	0	0	35	0	53	24	28	0	0	39	49	0	25	70	0	0	0	0	14	18	17	0	0	0	0	0	111	0	0	0	0	20	0	25	0	35	0	0	0	16	30	12
45	34	29	0	0	0	17	20	0	0	59	0	47	27	52	0	20	26	47	0	27	52	0	0	0	14	0	22	0	0	0	0	0	0	73	0	0	0	0	19	0	32	0	16	0	0	0	33	46	11
46	34	31	0	0	0	31	20	0	0	71	0	38	37	45	0	21	47	78	0	0	21	0	0	0	0	0	30	0	0	0	0	0	0	192	0	0	0	0	32	0	0	0	30	0	0	0	41	36	12
47	19	31	0	0	0	18	14	0	0	80	0	37	65	14	0	46	80	52	0	0	21	0	0	0	14	0	0	0	0	0	0	0	0	192	0	0	16	0	29	0	0	0	37	33	0	0	32	36	0
48	19	26	0	0	0	18	17	0	0	117	0	56	75	33	0	44	56	52	0	0	29	0	0	0	22	0	0	0	0	0	0	0	0	207	0	0	0	0	24	0	0	0	33	29	0	0	46	23	17
49	0	24	19	32	34	44	0	0	20	55	22	16	0	67	17	0	33	20	89	0	40	69	98	22	0	0	14	0	0	0	0	35	20	42	0	0	26	0	30	0	28	17	28	0	13	0	27	68	41
50	0	17	32	40	38	26	14	0	26	43	16	21	0	59	14	0	20	29	105	16	37	56	105	17	0	0	23	0	0	33	0	35	28	34	0	0	0	0	33	0	35	32	27	0	24	0	30	71	40
51	0	12	35	32	40	25	12	28	34	53	18	0	0	56	27	0	0	24	93	0	57	59	117	21	0	30	21	0	0	31	0	33	29	64	0	0	26	0	28	0	27	23	24	0	0	0	25	80	47
52	20	30	0	31	19	342	28	0	24	75	19	23	20	57	0	0	65	76	152	0	46	30	63	32	0	55	19	0	0	24	17	33	21	77	18	18	63	0	83	0	37	23	34	13	13	0	30	48	42
53	0	18	28	40	28	0	12	0	31	54	38	0	14	91	21	0	26	26	99	14	72	75	163	22	0	35	18	0	0	37	0	32	20	48	0	22	27	0	45	0	29	29	29	0	38	0	34	75	31
54	0	0	27	31	23	0	0	0	30	49	19	0	0	67	32	0	25	26	102	0	59	65	113	0	0	28	30	0	71	33	23	56	15	55	0	26	20	0	34	0	23	36	21	13	19	0	32	62	40
55	18	0	19	17	32	292	0	11	16	36	15	0	0	56	32	0	39	65	85	21	33	55	33	0	0	0	0	0	106	36	0	19	17	50	0	0	25	0	34	93	25	24	38	0	0	0	21	74	26
56	0	19	15	20	25	671	0	0	33	48	24	0	0	50	32	0	33	52	121	20	48	22	57	24	0	27	0	0	42	0	36	35	15	45	0	21	15	0	52	20	30	22	58	0	0	0	19	61	50
57	0	15	24	19	27	431	0	0	18	49	18	0	0	32	51	0	28	35	108	24	35	45	41	0	0	0	15	0	57	25	0	17	0	39	0	0	28	0	50	38	0	0	30	0	0	21	15	54	32
58	0	31	11	18	15	597	0	0	25	60	19	22	34	63	16	0	62	78	132	0	47	56	52	34	0	20	0	43	0	21	19	19	19	97	22	23	88	0	48	0	18	27	23	0	0	0	35	53	45
59	0	25	16	21	0	687	17	20	25	70	30	15	22	48	26	0	38	64	178	0	53	26	34	44	0	18	0	33	0	30	39	30	26	76	15	25	75	0	66	0	22	31	38	14	0	0	41	58	51
60	0	36	21	29	0	457	31	23	34	56	28	36	52	55	22	0	54	72	200	0	41	39	65	37	0	41	20	28	0	21	19	32	14	107	32	31	56	0	62	0	20	32	30	0	24	0	31	47	60
61	0	0	0	30	0	3109	0	0	0	50	0	0	0	42	29	0	28	54	85	0	23	30	56	32	0	20	0	0	23	22	35	14	18	23	0	0	20	34	21	19	14	21	12	0	0	22	22	26	0
62	0	23	0	21	26	1316	0	0	16	67	0	0	23	59	53	0	37	72	51	33	29	31	77	0	0	0	14	30	42	15	28	66	0	60	0	18	20	49	39	19	20	0	19	0	0	14	31	38	28
63	0	16	0	34	0	1649	0	20	17	44	15	18	16	50	64	0	39	76	71	32	22	40	52	28	0	0	22	24	49	0	0	22	11	48	0	0	19	53	37	29	12	0	0	0	0	14	15	38	38
64	0	0	17	17	0	1375	0	0	21	66	44	0	29	44	26	0	45	72	146	0	44	38	55	49	0	0	17	0	0	27	40	22	17	82	27	0	51	0	54	0	34	43	27	21	0	0	35	55	30
65	0	34	19	20	12	626	23	22	34	86	33	24	41	75	13	0	67	65	113	0	76	19	49	42	0	40	16	0	0	26	37	31	15	56	38	18	41	0	64	30	17	24	24	18	0	0	29	41	43
66	26	28	17	19	12	1117	18	13	31	71	26	23	26	64	32	13	66	56	137	21	52	20	58	29	15	34	21	30	27	19	39	18	17	72	25	24	42	22	69	30	27	28	25	23	25	15	37	34	38
[truncated: 173 more columns]

## Sheet: PacBio_35,000
Sample	Mycetohabitans_rhizoxinica	Mycetohabitans_endofungorum	Lysinibacillus_endophyticus	Lentzea_cavernae	Lentzea_violacea	Desulfuromonas_thiophila	Mycolicibacterium_goodii	Mycolicibacterium_aurum	Mycobacterium_sp._PYR15	Amycolatopsis_mediterranei	Bradyrhizobium_lupini	Catenulispora_acidiphila	Actinoplanes_missouriensis	Desulfuromonas_soudanensis	Desulfuromonas_michiganensis	Nocardioides_jensenii	Candidatus_Methylopumilus_turicensis	Prosthecobacter_dejongeii	Verrucomicrobium_spinosum	Prosthecobacter_fluviatilis	Streptomyces_sp._CC0208	Streptomyces_hygroscopicus	Streptomyces_sp._Z022	Geobacter_pickeringii	Sideroxydans_lithotrophicus	Thermosporothrix_hazakensis	Desulfovibrio_indonesiensis	Candidatus_Kuenenia_stuttgartiensis	Asanoa_ishikariensis	Verrucosispora_maris	Legionella_adelaidensis	Anaerolinea_thermophila	Pseudomonas_frederiksbergensis	Pseudomonas_syringae	Streptomyces_sp._M56	Cystobacter_fuscus	Streptomyces_sp._P3	Castellaniella_defragrans	Catellatospora_bangladeshensis	Desulfosporosinus_orientis	Thermodesulfovibrio_aggregans	Allokutzneria_multivorans	Thermosulfidibacter_takaii	Dissulfurimicrobium_hydrothermale	Desulfonatronum_zhilinae	Desulfonatronum_thiosulfatophilum	Phycisphaerae_bacterium_RAS2	Rhodopila_globiformis	Dokdonella_ginsengisoli
19	28	20	39	0	0	161	0	0	0	0	0	93	0	0	0	17	0	17	0	0	0	0	0	117	0	0	0	15	0	0	0	16	0	0	0	0	46	0	0	0	18	0	0	0	0	0	0	0	0
20	48	18	39	0	0	154	0	0	0	0	0	78	0	0	0	33	19	30	21	15	0	0	0	101	0	0	0	19	0	0	0	16	0	0	0	0	18	0	0	17	14	0	0	28	0	0	0	0	0
21	41	22	29	0	0	148	0	0	0	0	0	63	0	17	0	18	12	31	27	15	0	34	0	103	0	0	0	25	0	0	0	25	0	0	0	0	44	14	0	0	35	0	0	19	0	0	0	0	0
22	32	22	32	0	0	177	0	0	0	0	0	86	0	0	0	0	21	26	0	35	0	26	0	118	16	0	0	17	0	0	0	27	0	0	0	0	31	11	0	0	18	0	0	27	0	0	0	0	0
23	32	33	34	0	0	181	0	0	0	0	0	71	0	28	0	22	25	51	25	23	42	0	0	86	14	0	0	38	0	0	0	20	0	0	0	0	0	0	0	0	41	0	0	18	0	0	0	0	0
24	17	22	21	0	0	157	0	0	0	0	0	71	0	15	0	25	22	51	64	51	0	0	0	97	0	0	0	36	0	0	0	28	0	0	0	0	0	0	0	35	35	0	0	21	0	0	0	0	0
25	33	0	54	0	37	170	0	0	0	0	0	74	0	31	0	0	27	34	24	25	0	48	0	101	0	0	0	26	0	0	0	22	0	0	0	23	0	0	0	23	40	0	0	16	0	0	0	0	0
26	30	15	43	0	0	141	0	0	0	0	0	75	0	23	0	15	27	35	33	16	47	0	0	50	0	0	0	16	0	0	0	0	0	0	0	14	37	0	0	0	29	0	0	15	0	0	0	0	0
27	14	18	28	0	0	133	0	0	0	0	0	63	0	18	0	0	19	43	44	27	33	41	0	54	0	0	0	31	0	0	0	24	0	0	0	22	24	0	0	19	24	0	0	20	0	0	0	0	0
28	18	20	30	0	0	205	0	0	0	0	0	58	0	30	0	0	27	47	26	37	0	36	0	136	0	0	0	25	0	0	0	0	0	0	0	0	0	0	0	25	42	0	0	18	0	0	0	0	0
29	31	36	23	0	0	197	0	0	0	0	0	51	0	30	0	28	0	70	57	50	0	0	0	84	15	0	0	58	0	0	0	46	0	0	0	0	0	0	0	54	85	0	0	48	0	0	16	0	0
30	18	37	29	0	0	87	0	0	0	0	38	45	0	14	0	0	18	19	30	25	0	87	0	17	16	0	0	19	0	0	0	23	0	0	0	20	30	0	0	0	19	13	0	0	0	0	0	0	0
31	0	0	0	0	0	455	0	0	0	0	0	76	0	20	12	0	0	177	46	37	0	0	0	33	0	0	14	0	0	0	0	15	0	0	0	0	0	0	0	0	0	0	0	13	0	0	0	0	0
32	0	0	22	0	0	389	0	0	0	0	0	142	0	21	21	0	0	151	37	54	0	0	0	32	0	0	0	27	0	0	0	43	0	0	0	0	0	0	0	0	52	0	0	39	0	0	0	0	0
33	0	0	0	0	0	408	0	0	0	0	0	109	0	21	0	0	0	120	54	44	0	0	0	43	0	0	0	20	0	0	35	36	0	0	0	0	0	0	0	0	42	0	0	45	0	0	0	0	0
34	0	0	0	14	0	536	0	0	0	0	0	72	0	24	30	0	0	125	39	18	0	0	0	47	16	0	71	35	0	0	42	18	0	0	0	0	0	0	0	17	52	0	0	28	0	0	31	0	0
35	0	0	0	0	0	514	0	0	0	0	0	129	0	23	23	0	0	74	31	51	0	0	0	47	0	0	79	57	0	0	27	59	0	0	0	0	0	0	0	34	44	0	0	57	0	0	21	0	0
36	0	0	12	0	0	470	0	0	0	0	0	143	0	40	30	0	0	76	43	51	0	0	0	58	0	0	28	25	0	0	0	60	0	0	0	0	0	0	0	46	35	0	0	58	0	0	17	0	0
37	0	0	0	24	0	198	0	34	0	0	0	78	0	27	0	0	18	44	54	29	0	0	0	31	15	0	0	26	0	0	25	22	23	0	16	0	0	0	0	17	38	0	0	50	0	0	15	0	0
38	0	0	0	15	15	103	0	0	0	0	0	77	0	19	0	0	0	55	31	11	0	0	0	31	22	0	0	32	0	0	24	14	0	0	0	0	0	0	0	21	24	0	0	50	0	0	0	0	0
39	0	0	0	15	15	96	0	0	0	0	0	47	0	23	0	22	15	49	32	0	0	0	0	33	0	0	0	26	0	0	0	21	0	0	13	0	0	0	0	0	67	0	0	59	0	0	0	0	0
40	0	0	0	0	19	137	0	39	0	0	0	68	0	27	0	0	17	61	59	13	0	0	0	43	16	0	0	32	0	0	15	34	21	0	23	0	0	0	0	18	36	0	0	63	0	0	13	0	0
41	0	0	0	15	17	137	0	0	0	0	0	66	0	19	22	0	15	49	51	14	0	0	0	64	26	0	0	28	0	0	0	30	20	0	0	0	0	0	0	17	48	0	0	34	0	0	0	0	0
42	0	0	0	28	35	178	0	33	0	0	0	89	0	41	0	21	0	50	34	14	0	0	0	63	21	0	0	37	0	0	0	22	38	0	25	0	0	0	0	25	40	0	0	56	0	0	0	0	0
43	0	0	0	0	0	77	0	34	0	0	20	45	0	37	16	31	19	29	33	0	0	0	0	42	11	0	0	26	21	0	40	26	0	0	31	153	0	0	0	51	20	0	19	48	0	0	35	0	12
44	0	0	17	0	0	135	0	23	0	0	0	72	0	50	0	0	0	37	50	15	0	0	0	31	18	0	0	35	25	0	40	20	0	0	0	0	0	0	0	66	32	0	0	93	0	0	20	0	0
45	0	0	0	0	0	83	0	31	0	0	0	57	0	35	29	0	13	48	26	13	0	0	0	38	13	0	20	30	0	0	25	30	0	0	20	28	0	0	0	68	36	0	19	77	0	0	24	0	0
46	0	0	0	0	0	258	0	27	0	0	0	105	0	59	32	0	0	41	36	21	0	0	0	64	16	0	0	34	0	0	0	47	0	0	12	0	0	0	0	47	45	0	0	26	0	0	26	0	0
47	0	0	0	0	0	278	0	0	0	0	0	73	0	125	64	0	17	49	55	22	0	0	0	44	15	0	11	33	0	0	0	40	0	0	0	0	0	0	0	49	85	0	13	32	0	0	23	0	0
48	0	0	0	0	0	316	0	0	0	0	0	74	0	68	73	0	0	32	47	21	0	0	0	63	29	0	19	28	0	0	0	31	0	0	0	0	0	0	0	74	117	0	17	28	0	0	20	0	0
49	134	94	0	0	0	65	16	25	41	0	23	36	0	39	0	54	32	96	30	60	0	48	0	38	13	30	0	31	0	0	16	42	0	0	0	0	17	28	18	24	12	0	31	59	0	0	12	20	0
50	141	80	0	0	0	52	0	23	30	0	30	35	0	22	0	51	19	92	29	49	0	69	0	37	15	32	0	26	25	0	23	45	0	0	14	18	28	12	34	29	0	0	23	54	0	0	18	0	34
51	159	80	0	0	0	73	15	0	32	27	40	32	0	17	13	56	39	111	19	73	21	58	0	43	0	50	0	22	31	0	0	43	0	0	0	0	23	28	24	0	0	0	27	67	0	0	18	0	23
52	72	40	19	21	0	104	0	18	0	0	0	107	22	68	0	24	73	67	49	71	22	27	20	37	14	33	0	45	42	37	33	98	0	0	23	0	21	29	26	24	30	20	25	60	31	29	35	0	0
53	207	94	0	0	0	69	18	20	27	0	38	31	24	41	0	34	37	95	28	43	29	45	0	45	0	23	16	27	47	0	0	66	0	0	0	0	23	26	43	0	13	0	44	103	0	30	0	20	16
54	159	79	21	0	0	83	19	23	28	0	34	23	0	38	0	53	28	80	27	51	19	31	0	49	13	17	0	30	26	0	0	45	0	0	25	0	22	17	39	0	13	0	24	93	0	34	15	16	16
55	37	84	0	0	0	58	14	26	0	0	39	80	0	40	0	44	34	93	50	41	19	22	0	31	16	22	0	21	0	35	33	57	27	123	24	0	0	0	28	0	21	12	18	40	0	22	12	0	36
56	75	25	0	26	20	60	27	21	0	0	33	75	18	40	0	37	31	85	68	67	44	0	19	22	0	19	0	20	31	21	22	77	21	26	25	0	0	29	29	0	16	0	36	62	11	20	15	0	0
57	66	49	0	0	0	50	35	30	26	0	60	50	18	40	0	43	35	84	40	51	24	0	0	26	18	13	0	23	18	34	20	76	42	61	38	0	0	15	0	0	21	15	16	47	0	23	17	13	18
58	71	70	28	0	0	106	18	0	0	0	20	109	19	87	15	17	121	66	28	61	28	58	0	61	13	30	0	41	26	29	0	63	0	0	16	0	0	44	37	29	53	17	26	68	29	29	19	0	14
59	51	26	30	0	0	106	14	0	31	0	16	91	19	58	0	20	114	69	37	67	41	46	0	47	14	37	0	35	32	26	37	86	0	0	16	24	28	44	39	19	31	15	44	66	21	29	22	0	19
60	73	61	23	0	0	153	0	0	35	30	0	98	28	62	12	17	82	62	33	84	25	51	0	43	0	14	16	41	29	34	23	88	0	0	0	0	26	48	43	38	55	28	33	66	38	38	42	0	18
61	83	44	32	0	0	33	18	24	0	32	33	76	40	41	0	13	29	35	13	13	30	38	19	33	0	21	0	0	23	0	18	30	37	24	0	0	23	42	23	0	0	16	0	38	0	0	0	20	17
62	98	31	26	0	0	75	0	31	22	34	72	102	63	57	0	32	27	50	28	40	28	0	21	37	15	0	0	25	33	24	0	42	0	28	0	0	0	20	21	0	29	0	23	45	0	25	13	14	24
63	76	44	37	19	0	74	24	52	0	14	68	92	39	44	0	20	27	66	19	46	0	23	26	22	15	0	0	23	21	0	0	42	0	40	0	0	22	39	22	29	20	0	21	27	22	0	12	20	19
64	80	39	0	27	0	121	16	0	30	40	24	110	72	60	0	21	64	74	38	42	29	21	26	53	0	27	0	16	27	30	0	64	29	0	0	0	24	67	47	21	35	26	47	64	27	14	13	22	0
65	64	29	21	0	0	82	21	0	33	0	17	88	34	93	0	15	51	58	38	62	32	30	0	42	19	21	0	44	40	29	27	94	0	23	23	16	27	63	30	32	60	0	52	117	46	23	26	19	20
66	76	30	29	29	14	96	20	26	40	23	26	68	23	80	19	20	53	43	35	46	28	30	17	45	17	20	18	45	30	27	21	80	20	27	27	19	36	43	35	30	40	14	35	68	38	34	28	19	19
[truncated: 207 more columns]
