# Supplementary material for: Comparative evaluation of sequencing platforms: Pacific Biosciences, Oxford Nanopore Technologies, and Illumina for 16S rRNA-based soil microbiome profiling
Source: Front Microbiol. 2025 Aug 6;16:1633360. doi: 10.3389/fmicb.2025.1633360 (PMC12365774; doi:10.3389/fmicb.2025.1633360)
Supplement: SUPPLEMENTARY TABLE S5 — Taxonomic classification results across all sequencing technologies. [file Table_5.XLSX]

## Sheet: Лист1
						767374		937127		547526		506160		358714		206362
Kingdom	Phylum	Class	Order	Family	Number of technologies	ONT	%OfTotal	PacBio_Full	%OfTotal	PacBio_V4	%OfTotal	PacBio_V3_V4	%OfTotal	Illumina_V4	%OfTotal	Illumina_V3_V4	%OfTotal
Bacteria	Actinobacteriota	Thermoleophilia	Gaiellales	Gaiellaceae	6	79422	10.3498	92927	9.91616	69948	12.7753	53817	10.6324	63260	17.6352	35374	17.1417
Bacteria	Proteobacteria	Alphaproteobacteria	Rhizobiales	Xanthobacteraceae	6	27362	3.56567	35651	3.80429	24409	4.45805	24326	4.80599	17336	4.83282	10861	5.26308
Bacteria	Actinobacteriota	Thermoleophilia	Solirubrobacterales	Solirubrobacteraceae	6	26711	3.48083	51715	5.51846	20393	3.72457	18918	3.73755	13201	3.68009	3202	1.55164
Bacteria	Acidobacteriota	Blastocatellia	Pyrinomonadales	Pyrinomonadaceae	6	22975	2.99398	28528	3.0442	22414	4.09369	20776	4.10463	21127	5.88965	7083	3.43232
Bacteria	Acidobacteriota	Vicinamibacteria	Vicinamibacterales	2-12-FULL-66-21	6	20629	2.68826	26814	2.8613	20960	3.82813	19694	3.89086	30011	8.36628	2600	1.25992
Bacteria	Proteobacteria	Alphaproteobacteria	Sphingomonadales	Sphingomonadaceae	6	15649	2.03929	22362	2.38623	15169	2.77046	15043	2.97199	12765	3.55855	20014	9.69849
Bacteria	Firmicutes	Bacilli	Bacillales	Bacillaceae	6	25766	3.35768	16050	1.71268	21795	3.98063	10731	2.12008	16046	4.4732	3675	1.78085
Bacteria	Bacteroidota	Bacteroidia	Chitinophagales	Chitinophagaceae	6	24465	3.18815	26976	2.87859	11746	2.14529	12515	2.47254	3222	0.898209	1407	0.681812
Bacteria	Proteobacteria	Gammaproteobacteria	Burkholderiales	Burkholderiaceae	6	25601	3.33618	24900	2.65706	10704	1.95498	9050	1.78797	1445	0.402828	479	0.232116
Bacteria	Proteobacteria	Alphaproteobacteria	Rhizobiales	Rhizobiaceae	6	15026	1.95811	17189	1.83422	14345	2.61997	13370	2.64146	5465	1.5235	3992	1.93446
Bacteria	Actinobacteriota	UBA4738	UBA4738	HRBIN12	6	12842	1.6735	16875	1.80072	10215	1.86566	11341	2.2406	8301	2.3141	5363	2.59883
Bacteria	Chloroflexota	Ellin6529	CSP1-4	CSP1-4	6	3002	0.391204	7208	0.769159	5584	1.01986	4873	0.962739	28111	7.83661	15040	7.28816
Bacteria	Actinobacteriota	Actinomycetia	Actinomycetales	Micrococcaceae	6	12201	1.58997	13637	1.45519	10223	1.86713	4652	0.919077	13245	3.69236	4313	2.09002
Bacteria	Gemmatimonadota	Gemmatimonadetes	Gemmatimonadales	Gemmatimonadaceae	6	10350	1.34876	21713	2.31698	11192	2.0441	10668	2.10763	2334	0.650658	544	0.263614
Bacteria	Actinobacteriota	Actinomycetia	Mycobacteriales	Geodermatophilaceae	6	4491	0.585243	9156	0.977029	6358	1.16122	5354	1.05777	16190	4.51334	12579	6.0956
Bacteria	Verrucomicrobiota	Verrucomicrobiae	Chthoniobacterales	UBA10450	6	12711	1.65643	15365	1.63959	8882	1.62221	4844	0.95701	7903	2.20315	3990	1.9335
Bacteria	Actinobacteriota	Thermoleophilia	Solirubrobacterales	70-9	6	8254	1.07562	9159	0.977349	10814	1.97507	10867	2.14695	7122	1.98543	1778	0.861593
Bacteria	Proteobacteria	Gammaproteobacteria	Burkholderiales	SG8-39	6	16674	2.17286	11266	1.20218	7068	1.2909	7466	1.47503	3913	1.09084	606	0.293659
Bacteria	Proteobacteria	Alphaproteobacteria	Rhizobiales	Beijerinckiaceae	6	9574	1.24763	13079	1.39565	8630	1.57618	6329	1.2504	3662	1.02087	2349	1.13829
Bacteria	Gemmatimonadota	Gemmatimonadetes	Gemmatimonadales	GWC2-71-9	6	5834	0.760255	12087	1.28979	8023	1.46532	7476	1.477	6068	1.6916	3946	1.91217
Bacteria	Proteobacteria	Alphaproteobacteria	Geminicoccales	Geminicoccaceae	6	7286	0.949472	9971	1.064	6214	1.13492	7163	1.41517	4559	1.27093	4738	2.29597
Bacteria	Acidobacteriota	Acidobacteriae	Bryobacterales	Bryobacteraceae	6	12553	1.63584	5907	0.630331	6495	1.18625	3473	0.686147	1671	0.465831	2966	1.43728
Bacteria	Desulfobacterota_B	Binatia	UBA9968	UBA9968	6	3187	0.415312	10274	1.09633	6258	1.14296	7340	1.45013	2191	0.610793	2259	1.09468
Bacteria	Chloroflexota	Ellin6529	QHBO01	QHBO01	6	1140	0.148559	4608	0.491716	3036	0.554494	2781	0.549431	10564	2.94496	8129	3.93919
Bacteria	Actinobacteriota	Actinomycetia	Propionibacteriales	Nocardioidaceae	6	2992	0.389901	8812	0.940321	6450	1.17803	5394	1.06567	3728	1.03927	2783	1.3486
Bacteria	Actinobacteriota	Actinomycetia	Mycobacteriales	Pseudonocardiaceae	6	3123	0.406972	6322	0.674615	4779	0.872835	4394	0.868105	4631	1.291	3023	1.4649
Bacteria	Proteobacteria	Gammaproteobacteria	Steroidobacterales	Steroidobacteraceae	6	7607	0.991303	8387	0.894969	3116	0.569105	2469	0.48779	2239	0.624174	542	0.262645
Bacteria	Actinobacteriota	Rubrobacteria	Rubrobacterales	Rubrobacteraceae	6	4523	0.589413	4736	0.505374	2330	0.425551	3423	0.676268	3505	0.977102	2404	1.16494
Bacteria	Nitrospirota	Nitrospiria	Nitrospirales	Nitrospiraceae	6	4620	0.602053	5262	0.561503	3632	0.663347	3603	0.71183	1114	0.310554	726	0.351809
Bacteria	Actinobacteriota	Actinomycetia	Mycobacteriales	Mycobacteriaceae	6	2027	0.264148	3725	0.397491	2723	0.497328	2275	0.449463	3606	1.00526	2832	1.37235
Bacteria	Acidobacteriota	Acidobacteriae	Acidobacteriales	Koribacteraceae	6	4929	0.64232	6007	0.641002	1956	0.357243	1791	0.353841	1399	0.390004	718	0.347932
Bacteria	Proteobacteria	Gammaproteobacteria	Xanthomonadales	Xanthomonadaceae	6	6474	0.843656	3015	0.321728	2526	0.461348	2538	0.501422	1510	0.420948	669	0.324188
Bacteria	Actinobacteriota	Acidimicrobiia	UBA5794	ZC4RG35	6	2264	0.295032	3183	0.339655	1836	0.335327	3354	0.662636	1430	0.398646	2502	1.21243
Bacteria	Bacteroidota	Bacteroidia	Cytophagales	Cyclobacteriaceae	6	2737	0.356671	4295	0.458316	2603	0.475411	3143	0.62095	95	0.0264835	327	0.158459
Bacteria	Actinobacteriota	UBA4738	CADDZG01	WHSQ01	6	2470	0.321877	3868	0.412751	2521	0.460435	289	0.0570966	3138	0.874792	198	0.0959479
Bacteria	Chloroflexota	Chloroflexia	Thermomicrobiales	UBA6265	6	256	0.0333605	3537	0.37743	2122	0.387562	1793	0.354236	3126	0.871446	718	0.347932
Bacteria	Proteobacteria	Alphaproteobacteria	Rhizobiales	Methyloligellaceae	6	2980	0.388337	3537	0.37743	959	0.175151	1776	0.350877	774	0.215771	1073	0.51996
Bacteria	Proteobacteria	Alphaproteobacteria	Reyranellales	Reyranellaceae	6	2081	0.271185	2738	0.29217	2063	0.376786	1937	0.382685	1079	0.300797	867	0.420135
Bacteria	Actinobacteriota	Actinomycetia	Propionibacteriales	Kribbellaceae	6	504	0.0656785	1346	0.14363	1050	0.191772	993	0.196183	3319	0.92525	1316	0.637714
Bacteria	Bacteroidota	Bacteroidia	Flavobacteriales	Flavobacteriaceae	6	444	0.0578597	999	0.106602	716	0.13077	620	0.122491	331	0.0922741	247	0.119693
Bacteria	Firmicutes	Bacilli	Bacillales	Planococcaceae	5	14540	1.89477	9782	1.04383	15803	2.88626	6357	1.25593	6853	1.91044	0	0
Bacteria	Acidobacteriota	Vicinamibacteria	Vicinamibacterales	Vicinamibacteraceae	5	10134	1.32061	10293	1.09836	6674	1.21894	1518	0.299905	5051	1.40809	0	0
Bacteria	Planctomycetota	Phycisphaerae	UBA1161	UBA1161	5	4958	0.6461	10996	1.17337	6970	1.273	6403	1.26502	4181	1.16555	0	0
Bacteria	Actinobacteriota	Actinomycetia	Streptomycetales	Streptomycetaceae	5	3511	0.457534	6837	0.72957	4858	0.887264	3659	0.722894	0	0	4706	2.28046
Bacteria	Actinobacteriota	Acidimicrobiia	Acidimicrobiales	Ilumatobacteraceae	5	4720	0.615085	6160	0.657328	4137	0.755581	4137	0.81733	0	0	3522	1.70671
Bacteria	Actinobacteriota	Actinomycetia	Mycobacteriales	Micromonosporaceae	5	2942	0.383385	7496	0.799892	4288	0.783159	4515	0.89201	0	0	1971	0.955118
Bacteria	Myxococcota	Myxococcia	Myxococcales	Myxococcaceae	5	3543	0.461704	3873	0.413284	3032	0.553764	2350	0.46428	1374	0.383035	0	0
Bacteria	Myxococcota	Polyangia	Polyangiales	Polyangiaceae	5	3087	0.402281	4000	0.426836	2950	0.538787	2592	0.512091	419	0.116806	0	0
Bacteria	Methylomirabilota	Methylomirabilia	Rokubacteriales	GWA2-73-35	5	2822	0.367748	3990	0.425769	2992	0.546458	2035	0.402047	850	0.236958	0	0
Bacteria	Verrucomicrobiota	Verrucomicrobiae	Chthoniobacterales	Chthoniobacteraceae	5	1799	0.234436	2406	0.256742	1472	0.268846	4670	0.922633	0	0	1303	0.631415
Bacteria	Bacteroidota	Bacteroidia	Sphingobacteriales	Sphingobacteriaceae	5	2785	0.362926	2704	0.288541	1857	0.339162	1771	0.349889	0	0	283	0.137138
Bacteria	Acidobacteriota	Vicinamibacteria	Vicinamibacterales	SCN-69-37	5	2231	0.290732	1771	0.188982	1909	0.348659	1355	0.267702	2037	0.567862	0	0
Bacteria	Actinobacteriota	Acidimicrobiia	Acidimicrobiales	AC-14	5	2491	0.324614	3257	0.347552	1722	0.314506	1508	0.29793	0	0	283	0.137138
Bacteria	Acidobacteriota	Vicinamibacteria	Fen-336	Fen-336	5	1971	0.25685	2239	0.238922	1337	0.244189	1027	0.2029	880	0.245321	0	0
Bacteria	Proteobacteria	Gammaproteobacteria	Burkholderiales	Nitrosomonadaceae	5	2519	0.328262	2063	0.220141	1264	0.230857	991	0.195788	0	0	161	0.0780182
Bacteria	Chloroflexota	Chloroflexia	Chloroflexales	Roseiflexaceae	5	506	0.0659392	2073	0.221208	1226	0.223916	1135	0.224237	0	0	809	0.39203
Bacteria	Proteobacteria	Alphaproteobacteria	Acetobacterales	Acetobacteraceae	5	1480	0.192866	2345	0.250233	1502	0.274325	288	0.056899	0	0	107	0.0518506
Bacteria	Chloroflexota	Anaerolineae	Caldilineales	Caldilineaceae	5	1226	0.159766	1828	0.195064	967	0.176613	942	0.186107	339	0.0945043	0	0
Bacteria	Actinobacteriota	Thermoleophilia	Gaiellales	F1-60-MAGs149	5	992	0.129272	2051	0.21886	191	0.0348842	242	0.047811	0	0	1759	0.852386
Bacteria	Proteobacteria	Alphaproteobacteria	Rhizobiales	Devosiaceae	5	1340	0.174622	1299	0.138615	1037	0.189397	950	0.187688	0	0	308	0.149252
Bacteria	Chloroflexota	UBA6077	UBA6077	SHYK01	5	661	0.0861379	1886	0.201253	579	0.105748	1054	0.208235	0	0	127	0.0615423
Bacteria	Verrucomicrobiota	Verrucomicrobiae	Pedosphaerales	BJHT01	5	535	0.0697183	789	0.0841935	1624	0.296607	1295	0.255848	0	0	52	0.0251984
Bacteria	Actinobacteriota	Actinomycetia	Jiangellales	Jiangellaceae	5	494	0.0643754	1260	0.134453	797	0.145564	840	0.165955	0	0	877	0.424981
Bacteria	Firmicutes_A	Clostridia	Clostridiales	Clostridiaceae	5	1087	0.141652	864	0.0921967	1069	0.195242	868	0.171487	0	0	262	0.126961
Bacteria	Chloroflexota	Dehalococcoidia	DSTF01	WHTK01	5	594	0.0774068	1408	0.150246	724	0.132231	910	0.179785	0	0	400	0.193834
Bacteria	Actinobacteriota	Actinomycetia	Actinomycetales	Angustibacteraceae	5	393	0.0512136	836	0.0892088	675	0.123282	804	0.158843	0	0	474	0.229693
Bacteria	Actinobacteriota	Actinomycetia	Euzebyales	Egibacteraceae	5	324	0.0422219	808	0.086221	565	0.103191	169	0.0333887	1080	0.301076	0	0
Bacteria	Acidobacteriota	Acidobacteriae	Acidobacteriales	Acidobacteriaceae	5	636	0.0828801	814	0.0868612	474	0.0865712	477	0.094239	0	0	365	0.176874
Bacteria	Actinobacteriota	Thermoleophilia	Ga0077560	Ga0077560	5	382	0.0497802	502	0.053568	462	0.0843796	339	0.0669749	218	0.0607726	0	0
Bacteria	Verrucomicrobiota	Verrucomicrobiae	Chthoniobacterales	Terrimicrobiaceae	5	346	0.0450888	375	0.0400159	430	0.0785351	397	0.0784337	0	0	339	0.164274
Bacteria	Actinobacteriota	Actinomycetia	Propionibacteriales	Propionibacteriaceae	4	18925	2.4662	24426	2.60648	17625	3.21903	18113	3.57851	0	0	0	0
Bacteria	Firmicutes	Bacilli	Bacillales	DSM-1321	4	24213	3.15531	17283	1.84425	0	0	12647	2.49862	0	0	5649	2.73742
Bacteria	Firmicutes	Bacilli	Paenibacillales	Paenibacillaceae	4	24513	3.1944	18232	1.94552	9042	1.65143	7557	1.49301	0	0	0	0
Bacteria	Planctomycetota	Planctomycetes	Gemmatales	Gemmataceae	4	12189	1.5884	12201	1.30196	3233	0.590474	2915	0.575905	0	0	0	0
Bacteria	Planctomycetota	Planctomycetes	Isosphaerales	Isosphaeraceae	4	5778	0.752957	9551	1.01918	5066	0.925253	4283	0.846175	0	0	0	0
Bacteria	Acidobacteriota	Vicinamibacteria	Vicinamibacterales	UBA2999	4	5948	0.775111	8021	0.855914	4043	0.738412	4911	0.970247	0	0	0	0
Bacteria	Planctomycetota	Planctomycetes	Pirellulales	Ga0077529	4	2772	0.361232	6301	0.672374	5659	1.03356	4815	0.95128	0	0	0	0
Bacteria	Proteobacteria	Alphaproteobacteria	Azospirillales	Azospirillaceae	4	4910	0.639844	5315	0.567159	2716	0.49605	2127	0.420223	0	0	0	0
Bacteria	Actinobacteriota	Acidimicrobiia	Acidimicrobiales	SKKL01	4	5012	0.653137	5692	0.607388	2133	0.389571	2025	0.400071	0	0	0	0
Bacteria	Chloroflexota	Ktedonobacteria	Ktedonobacterales	Ktedonobacteraceae	4	5185	0.675681	6025	0.642922	159	0.0290397	421	0.0831753	0	0	0	0
Bacteria	Planctomycetota	Planctomycetes	Pirellulales	Pirellulaceae	4	2159	0.281349	5641	0.601946	1414	0.258253	2024	0.399874	0	0	0	0
Bacteria	Actinobacteriota	Actinomycetia	Actinomycetales	Microbacteriaceae	4	2070	0.269751	2502	0.266986	1141	0.208392	2124	0.41963	0	0	0	0
Bacteria	Proteobacteria	Alphaproteobacteria	ATCC43930	Stellaceae	4	3268	0.425868	4262	0.454794	12	0.00219168	250	0.0493915	0	0	0	0
Bacteria	Proteobacteria	Gammaproteobacteria	Burkholderiales	UKL13-2	4	2605	0.339469	2069	0.220781	1634	0.298433	1375	0.271653	0	0	0	0
Bacteria	Actinobacteriota	Actinomycetia	Actinomycetales	Dermatophilaceae	4	1652	0.21528	2369	0.252794	1360	0.24839	1110	0.219298	0	0	0	0
Bacteria	Myxococcota	Polyangia	Haliangiales	Haliangiaceae	4	2259	0.294381	2507	0.26752	1338	0.244372	202	0.0399083	0	0	0	0
Bacteria	Proteobacteria	Alphaproteobacteria	Rhizobiales	Hyphomicrobiaceae	4	1620	0.21111	2063	0.220141	1625	0.29679	896	0.177019	0	0	0	0
Bacteria	Firmicutes	Bacilli	Thermoactinomycetales	Thermoactinomycetaceae	4	2575	0.33556	1602	0.170948	996	0.181909	967	0.191046	0	0	0	0
Bacteria	Proteobacteria	Alphaproteobacteria	Rhizobiales	Aestuariivirgaceae	4	2059	0.268318	2485	0.265172	196	0.0357974	991	0.195788	0	0	0	0
Bacteria	Bdellovibrionota	Bdellovibrionia_A	UBA1018	UBA1018	4	761	0.0991694	2391	0.255142	1656	0.302451	607	0.119923	0	0	0	0
Bacteria	Gemmatimonadota	Gemmatimonadetes	Longimicrobiales	Longimicrobiaceae	4	1214	0.158202	3677	0.392369	298	0.0544266	182	0.035957	0	0	0	0
Bacteria	Proteobacteria	Alphaproteobacteria	Rhodobacterales	Rhodobacteraceae	4	1996	0.260108	2662	0.28406	306	0.0558878	368	0.0727043	0	0	0	0
Bacteria	Proteobacteria	Alphaproteobacteria	Caulobacterales	Caulobacteraceae	4	777	0.101254	1316	0.140429	1646	0.300625	1499	0.296151	0	0	0	0
Bacteria	Bacteroidota	Bacteroidia	Cytophagales	Hymenobacteraceae	4	1277	0.166412	1529	0.163158	928	0.16949	969	0.191441	0	0	0	0
Bacteria	Planctomycetota	Planctomycetes	Planctomycetales	Planctomycetaceae	4	726	0.0946084	2008	0.214272	877	0.160175	1064	0.21021	0	0	0	0
Bacteria	Verrucomicrobiota	Verrucomicrobiae	Pedosphaerales	UBA8199	4	457	0.0595538	1292	0.137868	1617	0.295328	1091	0.215544	0	0	0	0
Bacteria	Actinobacteriota	Actinomycetia	Streptosporangiales	Streptosporangiaceae	4	0	0	1726	0.18418	990	0.180813	1343	0.265331	325	0.0906014	0	0
Bacteria	Proteobacteria	Gammaproteobacteria	Pseudomonadales	Pseudomonadaceae	4	982	0.127969	1265	0.134987	1057	0.19305	807	0.159436	0	0	0	0
Bacteria	Firmicutes	Alicyclobacillia	Tumebacillales	Tumebacillaceae	4	1350	0.175925	1234	0.131679	410	0.0748823	177	0.0349692	0	0	0	0
Bacteria	Patescibacteria	Saccharimonadia	Saccharimonadales	Saccharimonadaceae	4	1443	0.188044	1474	0.157289	30	0.00547919	47	0.0092856	0	0	0	0
Bacteria	Proteobacteria	Alphaproteobacteria	Dongiales	Dongiaceae	4	949	0.123669	1363	0.145445	160	0.0292224	153	0.0302276	0	0	0	0
Bacteria	Actinobacteriota	Acidimicrobiia	Acidimicrobiales	JACDCH01	4	829	0.108031	1085	0.115779	297	0.054244	300	0.0592698	0	0	0	0
Bacteria	Actinobacteriota	Actinomycetia	Mycobacteriales	Jatrophihabitantaceae	4	366	0.0476951	639	0.0681871	597	0.109036	595	0.117552	0	0	0	0
Bacteria	Proteobacteria	Gammaproteobacteria	Xanthomonadales	Rhodanobacteraceae	4	832	0.108422	493	0.0526076	477	0.0871192	320	0.0632211	0	0	0	0
Bacteria	Acidobacteriota	Blastocatellia	UBA7656	UBA7656	4	703	0.0916111	754	0.0804587	257	0.0469384	291	0.0574917	0	0	0	0
Bacteria	Patescibacteria	Saccharimonadia	Saccharimonadales	UBA4665	4	160	0.0208503	703	0.0750165	363	0.0662982	387	0.076458	0	0	0	0
Bacteria	Acidobacteriota	Thermoanaerobaculia	UBA5066	Gp7-AA6	4	221	0.0287995	319	0.0340402	599	0.109401	409	0.0808045	0	0	0	0
Bacteria	Proteobacteria	Alphaproteobacteria	Rhizobiales	Labraceae	4	159	0.02072	505	0.0538881	465	0.0849275	419	0.0827801	0	0	0	0
Bacteria	Armatimonadota	Armatimonadia	Armatimonadales	Armatimonadaceae	4	523	0.0681545	650	0.0693609	214	0.0390849	120	0.0237079	0	0	0	0
Bacteria	Actinobacteriota	Actinomycetia	Actinomycetales	Cellulomonadaceae	4	347	0.0452191	489	0.0521808	227	0.0414592	358	0.0707286	0	0	0	0
Bacteria	Bacteroidota	Bacteroidia	Cytophagales	172606-1	4	445	0.05799	249	0.0265706	343	0.0626454	224	0.0442548	0	0	0	0
Bacteria	Armatimonadota	Fimbriimonadia	Fimbriimonadales	Fimbriimonadaceae	4	288	0.0375306	498	0.0531411	185	0.0337883	284	0.0561087	0	0	0	0
Bacteria	Verrucomicrobiota	Verrucomicrobiae	Opitutales	Opitutaceae	4	168	0.0218928	497	0.0530344	464	0.0847448	116	0.0229177	0	0	0	0
Bacteria	Armatimonadota	Abditibacteria	Abditibacteriales	Abditibacteriaceae	4	245	0.0319271	498	0.0531411	237	0.0432856	153	0.0302276	0	0	0	0
Bacteria	Bacteroidota	Bacteroidia	Chitinophagales	Saprospiraceae	4	322	0.0419613	573	0.0611443	148	0.0270307	65	0.0128418	0	0	0	0
Bacteria	Actinobacteriota	Actinomycetia	Euzebyales	Euzebyaceae	4	63	0.00820982	63	0.00672267	0	0	400	0.0790264	0	0	574	0.278152
Bacteria	Gemmatimonadota	Gemmatimonadetes	Longimicrobiales	UBA6960	4	211	0.0274964	314	0.0335067	275	0.0502259	204	0.0403035	0	0	0	0
Bacteria	Chloroflexota	Chloroflexia	Chloroflexales	Herpetosiphonaceae	4	213	0.027757	374	0.0399092	44	0.00803615	89	0.0175834	0	0	0	0
Bacteria	Deinococcota	Deinococci	Deinococcales	Trueperaceae	4	248	0.032318	117	0.012485	166	0.0303182	122	0.0241031	0	0	0	0
Bacteria	Proteobacteria	Gammaproteobacteria	Woeseiales	Woeseiaceae	4	166	0.0216322	179	0.0191009	156	0.0284918	146	0.0288446	0	0	0	0
Bacteria	Eisenbacteria	RBG-16-71-46	RBG-16-71-46	RBG-16-71-46	4	75	0.00977359	297	0.0316926	129	0.0235605	115	0.0227201	0	0	0	0
Bacteria	Firmicutes	Bacilli	Bacillales	Fictibacillaceae	4	258	0.0336212	88	0.0093904	142	0.0259348	124	0.0244982	0	0	0	0
Bacteria	Firmicutes_E	Symbiobacteriia	Symbiobacteriales	Symbiobacteriaceae	4	181	0.0235869	180	0.0192076	126	0.0230126	59	0.0116564	0	0	0	0
Bacteria	Armatimonadota	Armatimonadia	Armatimonadales	Capsulimonadaceae	4	143	0.018635	158	0.01686	125	0.02283	87	0.0171882	0	0	0	0
Bacteria	Sumerlaeota	Sumerlaeia	Sumerlaeales	Sumerlaeaceae	4	163	0.0212413	94	0.0100307	107	0.0195425	76	0.015015	0	0	0	0
Bacteria	Bdellovibrionota	Oligoflexia	Oligoflexales	Oligoflexaceae	4	88	0.0114677	172	0.018354	98	0.0178987	51	0.0100759	0	0	0	0
Bacteria	Patescibacteria	UBA1384	2-12-FULL-50-11	2-12-FULL-50-11	4	106	0.0138133	87	0.00928369	72	0.0131501	67	0.0132369	0	0	0	0
Bacteria	Firmicutes	Bacilli	Bacillales	DSM-18226	3	50052	6.5225	35547	3.79319	0	0	15008	2.96507	0	0	0	0
Bacteria	Chloroflexota	Anaerolineae	Anaerolineales	EnvOPS12	3	0	0	1864	0.198906	1309	0.239075	1188	0.234708	0	0	0	0
Bacteria	Proteobacteria	Gammaproteobacteria	GCA-2729495	GCA-2729495	3	646	0.0841832	735	0.0784312	0	0	1704	0.336652	0	0	0	0
Bacteria	Proteobacteria	Gammaproteobacteria	Burkholderiales	Rhodocyclaceae	3	0	0	116	0.0123783	1415	0.258435	1106	0.218508	0	0	0	0
Bacteria	Cyanobacteria	Cyanobacteriia	Cyanobacteriales	Microcoleaceae	3	1222	0.159244	0	0	557	0.10173	521	0.102932	0	0	0	0
Bacteria	Chloroflexota	Anaerolineae	Anaerolineales	UBA6663	3	0	0	957	0.102121	560	0.102278	694	0.137111	0	0	0	0
Bacteria	Actinobacteriota	Actinomycetia	Nanopelagicales	FW305-bin1	3	0	0	0	0	516	0.0942421	583	0.115181	0	0	1039	0.503484
Bacteria	Desulfobacterota_B	Binatia	Bin18	Bin18	3	0	0	859	0.0916631	683	0.124743	526	0.10392	0	0	0	0
Bacteria	Chloroflexota	Ellin6529	P2-11E	P2-11E	3	0	0	938	0.100093	491	0.0896761	631	0.124664	0	0	0	0
Bacteria	Firmicutes	Bacilli	Bacillales	Domibacillaceae	3	736	0.0959115	462	0.0492996	0	0	331	0.0653943	0	0	0	0
Bacteria	Actinobacteriota	Thermoleophilia	UBA2241	UBA2241	3	92	0.0119889	0	0	465	0.0849275	639	0.126245	0	0	0	0
Bacteria	Firmicutes_A	Clostridia	Peptostreptococcales	Peptostreptococcaceae	3	600	0.0781887	0	0	303	0.0553398	276	0.0545282	0	0	0	0
Bacteria	Firmicutes	Bacilli	Bacillales	Anoxybacillaceae	3	277	0.0360971	568	0.0606108	0	0	310	0.0612455	0	0	0	0
Bacteria	Eisenbacteria	RBG-16-71-46	SZUA-252	SZUA-252	3	0	0	470	0.0501533	251	0.0458426	232	0.0458353	0	0	0	0
Bacteria	Planctomycetota	UBA1135	UBA1135	GCA-002686595	3	0	0	375	0.0400159	248	0.0452947	155	0.0306227	0	0	0	0
Bacteria	Desulfobacterota_B	Binatia	UTPRO1	DP-6	3	0	0	419	0.0447111	201	0.0367106	100	0.0197566	0	0	0	0
Bacteria	Chloroflexota	Dehalococcoidia	UBA2979	UBA2979	3	0	0	0	0	378	0.0690378	46	0.00908804	283	0.0788929	0	0
Bacteria	Cyanobacteria	Cyanobacteriia	Cyanobacteriales	Nostocaceae	3	0	0	240	0.0256102	245	0.0447467	79	0.0156077	0	0	0	0
Bacteria	Acidobacteriota	Thermoanaerobaculia	UBA5704	QQVD01	3	135	0.0175925	193	0.0205949	0	0	192	0.0379327	0	0	0	0
Bacteria	Bacteroidota	Rhodothermia	Rhodothermales	Rhodothermaceae	3	0	0	190	0.0202747	138	0.0252043	187	0.0369448	0	0	0	0
Bacteria	Armatimonadota	Chthonomonadetes	Chthonomonadales	Chthonomonadaceae	3	0	0	166	0.0177137	139	0.0253869	152	0.03003	0	0	0	0
Bacteria	Chloroflexota	Anaerolineae	4572-78	J111	3	0	0	173	0.0184607	126	0.0230126	118	0.0233128	0	0	0	0
Bacteria	Nitrospirota	Nitrospiria	Nitrospirales	UBA8639	3	134	0.0174622	0	0	98	0.0178987	92	0.0181761	0	0	0	0
Bacteria	Actinobacteriota	Acidimicrobiia	Acidimicrobiales	SZUA-35	3	0	0	110	0.011738	105	0.0191772	85	0.0167931	0	0	0	0
Bacteria	Chloroflexota	Dehalococcoidia	UBA2963	UBA2963	3	0	0	138	0.0147259	91	0.0166202	68	0.0134345	0	0	0	0
Bacteria	Planctomycetota	Planctomycetes	Pan216	Pan216	3	0	0	161	0.0171802	68	0.0124195	54	0.0106686	0	0	0	0
Bacteria	Actinobacteriota	Actinomycetia	Mycobacteriales	Nakamurellaceae	3	0	0	144	0.0153661	82	0.0149765	45	0.00889047	0	0	0	0
Bacteria	Patescibacteria	Microgenomatia	Levybacterales	UBA12049	3	91	0.0118586	105	0.0112045	62	0.0113237	0	0	0	0	0	0
Bacteria	Acidobacteriota	Mor1	Mor1	Mor1	3	0	0	60	0.00640255	33	0.00602711	32	0.00632211	0	0	0	0
Bacteria	Verrucomicrobiota	Verrucomicrobiae	Pedosphaerales	Pedosphaeraceae	2	3393	0.442157	4141	0.441882	0	0	0	0	0	0	0	0
Bacteria	Proteobacteria	Alphaproteobacteria	Rhizobiales	Afifellaceae	2	3264	0.425347	3929	0.41926	0	0	0	0	0	0	0	0
Bacteria	Actinobacteriota	Actinomycetia	Mycobacteriales	Frankiaceae	2	1789	0.233133	5130	0.547418	0	0	0	0	0	0	0	0
Bacteria	Proteobacteria	Gammaproteobacteria	Burkholderiales	WYBJ01	2	3369	0.43903	3321	0.354381	0	0	0	0	0	0	0	0
Bacteria	Acidobacteriota	Acidobacteriae	20CM-2-55-15	20CM-2-55-15	2	2378	0.309888	3075	0.328131	0	0	0	0	0	0	0	0
Bacteria	Acidobacteriota	Thermoanaerobaculia	UBA5704	UBA5704	2	3141	0.409318	2285	0.24383	0	0	0	0	0	0	0	0
Bacteria	Actinobacteriota	UBA4738	CADDZG01	CADDZG01	2	0	0	0	0	0	0	2179	0.430496	0	0	2760	1.33746
Bacteria	Actinobacteriota	Acidimicrobiia	IMCC26256	PALSA-555	2	1664	0.216843	2162	0.230705	0	0	0	0	0	0	0	0
Bacteria	Actinobacteriota	Acidimicrobiia	IMCC26256	IMCC26256	2	1726	0.224923	1360	0.145124	0	0	0	0	0	0	0	0
Bacteria	Proteobacteria	Alphaproteobacteria	Rhizobiales	Im1	2	1397	0.182049	1625	0.173402	0	0	0	0	0	0	0	0
Bacteria	Actinobacteriota	Actinomycetia	Sporichthyales	Sporichthyaceae	2	1053	0.137221	1691	0.180445	0	0	0	0	0	0	0	0
Bacteria	Planctomycetota	Planctomycetes	Pirellulales	PNKZ01	2	835	0.108813	1379	0.147152	0	0	0	0	0	0	0	0
Bacteria	Myxococcota	Polyangia	Polyangiales	SG8-38	2	0	0	0	0	175	0.031962	2021	0.399281	0	0	0	0
Bacteria	Actinobacteriota	Acidimicrobiia	UBA5794	UBA4744	2	485	0.0632026	1700	0.181406	0	0	0	0	0	0	0	0
Bacteria	Cyanobacteria	Cyanobacteriia	Cyanobacteriales	Coleofasciculaceae	2	1193	0.155465	779	0.0831264	0	0	0	0	0	0	0	0
Bacteria	Firmicutes_A	Clostridia	Oscillospirales	Oscillospiraceae	2	1024	0.133442	716	0.0764037	0	0	0	0	0	0	0	0
Bacteria	Planctomycetota	Planctomycetes	Pirellulales	UBA1268	2	609	0.0793616	1013	0.108096	0	0	0	0	0	0	0	0
Bacteria	Proteobacteria	Alphaproteobacteria	Rhizobiales	Rhodomicrobiaceae	2	714	0.0930446	881	0.0940107	0	0	0	0	0	0	0	0
Bacteria	Elusimicrobiota	Elusimicrobia	2-01-FULL-59-12	2-01-FULL-59-12	2	764	0.0995603	790	0.0843002	0	0	0	0	0	0	0	0
Bacteria	Acidobacteriota	Thermoanaerobaculia	Thermoanaerobaculales	Thermoanaerobaculaceae	2	152	0.0198078	1347	0.143737	0	0	0	0	0	0	0	0
Bacteria	Myxococcota	Polyangia	Polyangiales	Sandaracinaceae	2	486	0.0633329	981	0.104682	0	0	0	0	0	0	0	0
Bacteria	Verrucomicrobiota	Verrucomicrobiae	Pedosphaerales	UBA11358	2	545	0.0710214	738	0.0787513	0	0	0	0	0	0	0	0
Bacteria	Chloroflexota	Chloroflexia	Thermomicrobiales	Thermomicrobiaceae	2	43	0.00560353	1124	0.119941	0	0	0	0	0	0	0	0
Bacteria	Desulfobacterota	BSN033	BSN033	UBA1163	2	581	0.0757128	379	0.0404428	0	0	0	0	0	0	0	0
Bacteria	Acidobacteriota	Acidobacteriae	Acidobacteriales	Gp1-AA112	2	484	0.0630722	428	0.0456715	0	0	0	0	0	0	0	0
Bacteria	Firmicutes	Bacilli	Mycoplasmatales	Mycoplasmataceae	2	463	0.0603356	313	0.0334	0	0	0	0	0	0	0	0
Bacteria	Firmicutes	Bacilli	Bacillales	SA4	2	414	0.0539502	296	0.0315859	0	0	0	0	0	0	0	0
Bacteria	Proteobacteria	Alphaproteobacteria	Micropepsales	Micropepsaceae	2	109	0.0142043	600	0.0640255	0	0	0	0	0	0	0	0
Bacteria	Chloroflexota	Anaerolineae	SBR1031	A4b	2	0	0	571	0.0609309	104	0.0189945	0	0	0	0	0	0
Bacteria	Planctomycetota	Planctomycetes	Pirellulales	UBA7805	2	0	0	0	0	382	0.0697684	278	0.0549233	0	0	0	0
Bacteria	Firmicutes	Bacilli	Lactobacillales	Streptococcaceae	2	0	0	0	0	324	0.0591753	305	0.0602576	0	0	0	0
Bacteria	Proteobacteria	Gammaproteobacteria	JACCXJ01	JACCXJ01	2	295	0.0384428	317	0.0338268	0	0	0	0	0	0	0	0
Bacteria	Cyanobacteria	Cyanobacteriia	Phormidesmiales	Phormidesmiaceae	2	296	0.0385731	264	0.0281712	0	0	0	0	0	0	0	0
Bacteria	Verrucomicrobiota	Verrucomicrobiae	Pedosphaerales	CAIYYI01	2	0	0	0	0	353	0.0644718	194	0.0383278	0	0	0	0
Bacteria	Acidobacteriota	Acidobacteriae	Acidobacteriales	Gp1-AA117	2	0	0	0	0	144	0.0263001	364	0.071914	0	0	0	0
Bacteria	Actinobacteriota	Actinomycetia	Actinomycetales	Kineosporiaceae	2	114	0.0148559	389	0.0415098	0	0	0	0	0	0	0	0
Bacteria	Bacteroidota	Bacteroidia	AKYH767	B-17BO	2	0	0	235	0.0250766	225	0.0410939	0	0	0	0	0	0
Bacteria	Verrucomicrobiota	Verrucomicrobiae	Pedosphaerales	UBA3939	2	0	0	0	0	286	0.052235	173	0.0341789	0	0	0	0
Bacteria	Firmicutes	Bacilli	Brevibacillales	Brevibacillaceae	2	206	0.0268448	226	0.0241163	0	0	0	0	0	0	0	0
Bacteria	Actinobacteriota	Actinomycetia	Mycobacteriales	Cryptosporangiaceae	2	0	0	0	0	155	0.0283092	243	0.0480085	0	0	0	0
Bacteria	Proteobacteria	Gammaproteobacteria	Burkholderiales	Ferrovaceae	2	220	0.0286692	157	0.0167533	0	0	0	0	0	0	0	0
Bacteria	Planctomycetota	Phycisphaerae	Phycisphaerales	SM1A02	2	0	0	235	0.0250766	0	0	134	0.0264738	0	0	0	0
Bacteria	Proteobacteria	Alphaproteobacteria	Rhodospirillales	Rhodospirillaceae	2	0	0	0	0	176	0.0321446	159	0.031413	0	0	0	0
Bacteria	Verrucomicrobiota	Verrucomicrobiae	Verrucomicrobiales	Akkermansiaceae	2	0	0	0	0	145	0.0264828	133	0.0262763	0	0	0	0
Bacteria	Myxococcota	UBA796	UBA796	GCA-2862545	2	70	0.00912202	185	0.0197412	0	0	0	0	0	0	0	0
Bacteria	Patescibacteria	Saccharimonadia	Saccharimonadales	UBA10212	2	0	0	0	0	162	0.0295876	91	0.0179785	0	0	0	0
Bacteria	Proteobacteria	Alphaproteobacteria	Rhodospirillales	UXAT02	2	0	0	126	0.0134453	125	0.02283	0	0	0	0	0	0
Bacteria	Actinobacteriota	Acidimicrobiia	Acidimicrobiales	CAIXPF01	2	0	0	0	0	47	0.00858407	196	0.0387229	0	0	0	0
Bacteria	Bacteroidota	Bacteroidia	AKYH767-A	JABDAW01	2	129	0.0168106	95	0.0101374	0	0	0	0	0	0	0	0
Bacteria	Planctomycetota	Planctomycetes	Gemmatales	HRBIN36	2	152	0.0198078	0	0	64	0.0116889	0	0	0	0	0	0
Bacteria	Firmicutes	Bacilli	Haloplasmatales	Turicibacteraceae	2	0	0	0	0	110	0.0200904	105	0.0207444	0	0	0	0
Bacteria	Bacteroidota	Kapabacteria	OLB7	OLB7	2	0	0	0	0	122	0.022282	81	0.0160028	0	0	0	0
Bacteria	Planctomycetota	Phycisphaerae	UBA1845	PWPN01	2	0	0	0	0	127	0.0231952	70	0.0138296	0	0	0	0
Bacteria	Patescibacteria	Paceibacteria	2-02-FULL-40-12	GWA2-44-9	2	0	0	0	0	96	0.0175334	92	0.0181761	0	0	0	0
Bacteria	Proteobacteria	Alphaproteobacteria	Rhodospirillales	2-12-FULL-67-15	2	0	0	0	0	93	0.0169855	80	0.0158053	0	0	0	0
Bacteria	Actinobacteriota	Acidimicrobiia	Acidimicrobiales	Microtrichaceae	2	0	0	0	0	101	0.0184466	72	0.0142248	0	0	0	0
Bacteria	Acidobacteriota	Acidobacteriae	UBA7541	UBA7541	2	0	0	0	0	89	0.0162549	81	0.0160028	0	0	0	0
Bacteria	Patescibacteria	Andersenbacteria	UBA10190	UBA10190	2	0	0	0	0	73	0.0133327	94	0.0185712	0	0	0	0
Bacteria	Actinobacteriota	Acidimicrobiia	UBA5794	UBA5794	2	0	0	0	0	79	0.0144285	80	0.0158053	0	0	0	0
Bacteria	Planctomycetota	GCA-002687715	GCA-002687715	CAIWVZ01	2	0	0	0	0	84	0.0153417	57	0.0112613	0	0	0	0
Bacteria	Chloroflexota	Dehalococcoidia	UBA3495	UBA3495	2	0	0	0	0	74	0.0135153	55	0.0108661	0	0	0	0
Bacteria	Patescibacteria	Saccharimonadia	UBA4664	UBA4664	2	0	0	0	0	62	0.0113237	57	0.0112613	0	0	0	0
Bacteria	Patescibacteria	Saccharimonadia	Saccharimonadales	JACDBH01	2	0	0	0	0	77	0.0140633	27	0.00533428	0	0	0	0
Bacteria	Bacteroidota	Kapabacteria	Palsa-1295	Palsa-1295	2	0	0	0	0	57	0.0104105	38	0.00750751	0	0	0	0
Bacteria	Proteobacteria	Alphaproteobacteria	Caulobacterales	Hyphomonadaceae	2	0	0	52	0.00554887	38	0.00694031	0	0	0	0	0	0
Bacteria	Eremiobacterota	Eremiobacteria	Baltobacterales	Baltobacteraceae	2	0	0	0	0	39	0.00712295	35	0.00691481	0	0	0	0
Bacteria	Armatimonadota	Fimbriimonadia	Fimbriimonadales	ATM1	2	0	0	0	0	32	0.00584447	41	0.00810021	0	0	0	0
Bacteria	Myxococcota	Polyangia	Nannocystales	Nannocystaceae	2	0	0	0	0	39	0.00712295	33	0.00651968	0	0	0	0
Bacteria	Proteobacteria	Alphaproteobacteria	UBA9655	UBA9655	2	0	0	0	0	24	0.00438335	22	0.00434645	0	0	0	0
Bacteria	Deinococcota	Deinococci	Deinococcales	Deinococcaceae	2	0	0	0	0	19	0.00347015	19	0.00375375	0	0	0	0
Bacteria	Actinobacteriota	Acidimicrobiia	Acidimicrobiales	SIRW01	1	0	0	1029	0.109804	0	0	0	0	0	0	0	0
Bacteria	Armatimonadota	UBA5829	DTJY01	DTJY01	1	0	0	998	0.106496	0	0	0	0	0	0	0	0
Bacteria	Proteobacteria	Gammaproteobacteria	SZUA-146	SZUA-146	1	0	0	0	0	933	0.170403	0	0	0	0	0	0
Bacteria	Armatimonadota	Chthonomonadetes	Chthonomonadales	CAJBBX01	1	0	0	891	0.0950778	0	0	0	0	0	0	0	0
Bacteria	Proteobacteria	Gammaproteobacteria	Burkholderiales	Chitinibacteraceae	1	0	0	0	0	773	0.141181	0	0	0	0	0	0
Bacteria	Chloroflexota	UBA2235	UBA12225	UBA12225	1	0	0	707	0.0754433	0	0	0	0	0	0	0	0
Bacteria	Planctomycetota	Planctomycetes	Pirellulales	Thermoguttaceae	1	0	0	492	0.0525009	0	0	0	0	0	0	0	0
Bacteria	Myxococcota	Polyangia	Palsa-1104	Fen-1088	1	0	0	485	0.0517539	0	0	0	0	0	0	0	0
Bacteria	Desulfobacterota	JdFR-97	JdFR-97	JdFR-97	1	462	0.0602053	0	0	0	0	0	0	0	0	0	0
Bacteria	Planctomycetota	Planctomycetes	Pirellulales	PALSA-1355	1	0	0	0	0	0	0	454	0.089695	0	0	0	0
Bacteria	Proteobacteria	Alphaproteobacteria	Rhizobiales	Tepidamorphaceae	1	0	0	0	0	0	0	446	0.0881144	0	0	0	0
Bacteria	Actinobacteriota	Actinomycetia	Actinomycetales	Kineococcaceae	1	0	0	0	0	303	0.0553398	0	0	0	0	0	0
Bacteria	Proteobacteria	Alphaproteobacteria	Thalassobaculales	Oceanibaculaceae	1	283	0.036879	0	0	0	0	0	0	0	0	0	0
Bacteria	Planctomycetota	MHYJ01	DSWA01	DSWA01	1	0	0	247	0.0263572	0	0	0	0	0	0	0	0
Bacteria	Firmicutes	Bacilli	Aneurinibacillales	Aneurinibacillaceae	1	0	0	235	0.0250766	0	0	0	0	0	0	0	0
Bacteria	Actinobacteriota	Actinomycetia	Mycobacteriales	HKI-0501	1	221	0.0287995	0	0	0	0	0	0	0	0	0	0
Bacteria	Chloroflexota	Dehalococcoidia	FW602-bin16	FW602-bin16	1	0	0	203	0.021662	0	0	0	0	0	0	0	0
Bacteria	Nitrospirota	Nitrospiria	Nitrospirales	NS-4	1	0	0	0	0	190	0.0347015	0	0	0	0	0	0
Bacteria	Proteobacteria	Alphaproteobacteria	CACIAM-22H2	CACIAM-22H2	1	0	0	186	0.0198479	0	0	0	0	0	0	0	0
Bacteria	Actinobacteriota	Actinomycetia	Acidothermales	Acidothermaceae	1	174	0.0226747	0	0	0	0	0	0	0	0	0	0
Bacteria	Bacteroidota	Bacteroidia	AKYH767-A	2013-40CM-41-45	1	0	0	168	0.0179271	0	0	0	0	0	0	0	0
Bacteria	Desulfobacterota_F	Desulfuromonadia	Geobacterales	Geobacteraceae	1	164	0.0213716	0	0	0	0	0	0	0	0	0	0
Bacteria	Actinobacteriota	RBG-13-55-18	RBG-13-55-18	RBG-13-55-18	1	136	0.0177228	0	0	0	0	0	0	0	0	0	0
Bacteria	Proteobacteria	Alphaproteobacteria	Rhizobiales	Kaistiaceae	1	129	0.0168106	0	0	0	0	0	0	0	0	0	0
Bacteria	Chloroflexota	Dehalococcoidia	DSGV01	DSGV01	1	0	0	0	0	127	0.0231952	0	0	0	0	0	0
Bacteria	Bacteroidota	Bacteroidia	Chitinophagales	CAIODY01	1	0	0	0	0	124	0.0226473	0	0	0	0	0	0
Bacteria	Actinobacteriota	Actinomycetia	Nanopelagicales	S36-B12	1	0	0	119	0.0126984	0	0	0	0	0	0	0	0
Bacteria	Proteobacteria	Gammaproteobacteria	PWYM01	PWYM01	1	0	0	116	0.0123783	0	0	0	0	0	0	0	0
Bacteria	Chloroflexota	Dehalococcoidia	SM23-28-2	WHTN01	1	0	0	0	0	0	0	109	0.0215347	0	0	0	0
Bacteria	Actinobacteriota	Acidimicrobiia	Acidimicrobiales	Bin134	1	0	0	102	0.0108843	0	0	0	0	0	0	0	0
Archaea	Asgardarchaeota	Lokiarchaeia	CR-4	SOKP01	1	101	0.0131618	0	0	0	0	0	0	0	0	0	0
Bacteria	Chloroflexota	Dehalococcoidia	SM23-28-2	RBG-16-64-32	1	0	0	99	0.0105642	0	0	0	0	0	0	0	0
Bacteria	Planctomycetota	Phycisphaerae	WQYP01	WQYP01	1	0	0	0	0	99	0.0180813	0	0	0	0	0	0
Bacteria	Planctomycetota	Planctomycetes	Planctomycetales	CA54	1	98	0.0127708	0	0	0	0	0	0	0	0	0	0
Bacteria	Bacteroidota	Bacteroidia	Cytophagales	Spirosomaceae	1	0	0	0	0	97	0.0177161	0	0	0	0	0	0
Bacteria	Myxococcota	UBA796	UBA796	SXON01	1	0	0	0	0	96	0.0175334	0	0	0	0	0	0
Bacteria	Actinobacteriota	Acidimicrobiia	Acidimicrobiales	CADCTF01	1	0	0	0	0	0	0	89	0.0175834	0	0	0	0
Bacteria	Planctomycetota	Phycisphaerae	Sedimentisphaerales	Anaerohalophaeraceae	1	0	0	0	0	0	0	0	0	88	0.0245321	0	0
Bacteria	Actinobacteriota	Actinomycetia	Streptomycetales	Catenulisporaceae	1	0	0	84	0.00896357	0	0	0	0	0	0	0	0
Bacteria	Myxococcota	UBA9160	UBA9160	UBA6930	1	0	0	81	0.00864344	0	0	0	0	0	0	0	0
Bacteria	Chloroflexota	Dehalococcoidia	UBA2991	UBA2991	1	0	0	0	0	0	0	75	0.0148174	0	0	0	0
Bacteria	Latescibacterota	UBA2968	UBA8231	UBA8231	1	0	0	73	0.00778977	0	0	0	0	0	0	0	0
Bacteria	Bacteroidota	Ignavibacteria	SJA-28	B-1AR	1	0	0	0	0	68	0.0124195	0	0	0	0	0	0
Bacteria	Proteobacteria	Gammaproteobacteria	Acidiferrobacterales	Sulfurifustaceae	1	0	0	0	0	0	0	62	0.0122491	0	0	0	0
Bacteria	Firmicutes	Bacilli	Caldalkalibacillales	Caldalkalibacillaceae	1	61	0.00794919	0	0	0	0	0	0	0	0	0	0
Bacteria	Bacteroidota	Bacteroidia	NS11-12g	SHWZ01	1	0	0	0	0	0	0	55	0.0108661	0	0	0	0
Bacteria	Proteobacteria	Gammaproteobacteria	DSM-16500	DSM-16500	1	0	0	0	0	53	0.00967991	0	0	0	0	0	0
Bacteria	Proteobacteria	Alphaproteobacteria	CAIVPW01	CAIVPW01	1	0	0	0	0	0	0	52	0.0102734	0	0	0	0
Bacteria	Patescibacteria	Saccharimonadia	Saccharimonadales	CAIOMD01	1	51	0.00664604	0	0	0	0	0	0	0	0	0	0
Bacteria	Bacteroidota	Bacteroidia	Cytophagales	Flammeovirgaceae	1	0	0	0	0	51	0.00931463	0	0	0	0	0	0
Bacteria	Myxococcota	UBA9160	UBA9160	SMWR01	1	0	0	0	0	0	0	49	0.00968073	0	0	0	0
Bacteria	Proteobacteria	Gammaproteobacteria	Berkiellales	Berkiellaceae	1	0	0	0	0	0	0	46	0.00908804	0	0	0	0
Bacteria	Proteobacteria	Gammaproteobacteria	Enterobacterales	Enterobacteriaceae	1	0	0	0	0	42	0.00767087	0	0	0	0	0	0
Bacteria	Patescibacteria	Doudnabacteria	UBA920	UBA920	1	0	0	0	0	40	0.00730559	0	0	0	0	0	0
Bacteria	Chloroflexota	FW602-bin22	FW602-bin22	FW602-bin22	1	0	0	37	0.00394824	0	0	0	0	0	0	0	0
Bacteria	Cyanobacteria	Cyanobacteriia	Leptolyngbyales	Leptolyngbyaceae	1	0	0	0	0	35	0.00639239	0	0	0	0	0	0
Bacteria	Dependentiae	Babeliae	Babeliales	Vermiphilaceae	1	0	0	0	0	0	0	32	0.00632211	0	0	0	0
Bacteria	Chloroflexota	Dehalococcoidia	SHYD01	SHYD01	1	0	0	0	0	31	0.00566183	0	0	0	0	0	0
Bacteria	Chloroflexota	Chloroflexia	Chloroflexales	Chloroflexaceae	1	0	0	0	0	0	0	30	0.00592698	0	0	0	0
Bacteria	Verrucomicrobiota	Verrucomicrobiae	Verrucomicrobiales	DEV007	1	0	0	0	0	26	0.00474863	0	0	0	0	0	0
Bacteria	Chloroflexota	Anaerolineae	SBR1031	J027	1	0	0	0	0	24	0.00438335	0	0	0	0	0	0
Bacteria	Proteobacteria	Alphaproteobacteria	Kiloniellales	Kiloniellaceae	1	0	0	0	0	24	0.00438335	0	0	0	0	0	0
